# Supplementary material for: Healthcare provision, functional ability and quality of life after proximal femoral fracture - ’ProFem': Study protocol of a population-based, prospective study based on individually linked survey and statutory health insurance data
Source: PubMed Central journal article supplement — BMJ Open. 2019 Jun 25;9(6):e028144. doi: 10.1136/bmjopen-2018-028144 (PMC6597653; doi:10.1136/bmjopen-2018-028144), 2019-06-25
Supplement: bmjopen-2018-028144.draft_revisions.pdf [file bmjopen-2018-028144.draft_revisions.pdf]

# BMJ Open

BMJ Open is committed to open peer review. As part of this commitment we make the peer review history of every article we publish publicly available.

When an article is published we post the peer reviewers' comments and the authors' responses online. We also post the versions of the paper that were used during peer review. These are the versions that the peer review comments apply to.

The versions of the paper that follow are the versions that were submitted during the peer review process. They are not the versions of record or the final published versions. They should not be cited or distributed as the published version of this manuscript.

BMJ Open is an open access journal and the full, final, typeset and author-corrected version of record of the manuscript is available on our site with no access controls, subscription charges or pay-per-view fees (<http://bmjopen.bmj.com>).

If you have any questions on BMJ Open's open peer review process please email [info.bmjopen@bmj.com](mailto:info.bmjopen@bmj.com)

# BMJ Open

## Healthcare provision, functional ability and quality of life after proximal femoral fracture - 'ProFem': Study protocol of a population-based, prospective study based on individually linked survey and statutory health insurance data

|                               |                                                                                                                                                                                                                                                                                                                                                                                                                                                                                                                                                                                                                                                                                                                                                                                                                                                                                                                                                                                                                                                                                                                                                                                                                                                                                                                                                                                                                                                                                                                                                                                                                                                                                                                                                                                                                                                                                                                                                                                                                                                                                                                                                                                                                                                                                                                                                                                                                                      |
|-------------------------------|--------------------------------------------------------------------------------------------------------------------------------------------------------------------------------------------------------------------------------------------------------------------------------------------------------------------------------------------------------------------------------------------------------------------------------------------------------------------------------------------------------------------------------------------------------------------------------------------------------------------------------------------------------------------------------------------------------------------------------------------------------------------------------------------------------------------------------------------------------------------------------------------------------------------------------------------------------------------------------------------------------------------------------------------------------------------------------------------------------------------------------------------------------------------------------------------------------------------------------------------------------------------------------------------------------------------------------------------------------------------------------------------------------------------------------------------------------------------------------------------------------------------------------------------------------------------------------------------------------------------------------------------------------------------------------------------------------------------------------------------------------------------------------------------------------------------------------------------------------------------------------------------------------------------------------------------------------------------------------------------------------------------------------------------------------------------------------------------------------------------------------------------------------------------------------------------------------------------------------------------------------------------------------------------------------------------------------------------------------------------------------------------------------------------------------------|
| Journal:                      | <i>BMJ Open</i>                                                                                                                                                                                                                                                                                                                                                                                                                                                                                                                                                                                                                                                                                                                                                                                                                                                                                                                                                                                                                                                                                                                                                                                                                                                                                                                                                                                                                                                                                                                                                                                                                                                                                                                                                                                                                                                                                                                                                                                                                                                                                                                                                                                                                                                                                                                                                                                                                      |
| Manuscript ID                 | bmjopen-2018-028144                                                                                                                                                                                                                                                                                                                                                                                                                                                                                                                                                                                                                                                                                                                                                                                                                                                                                                                                                                                                                                                                                                                                                                                                                                                                                                                                                                                                                                                                                                                                                                                                                                                                                                                                                                                                                                                                                                                                                                                                                                                                                                                                                                                                                                                                                                                                                                                                                  |
| Article Type:                 | Protocol                                                                                                                                                                                                                                                                                                                                                                                                                                                                                                                                                                                                                                                                                                                                                                                                                                                                                                                                                                                                                                                                                                                                                                                                                                                                                                                                                                                                                                                                                                                                                                                                                                                                                                                                                                                                                                                                                                                                                                                                                                                                                                                                                                                                                                                                                                                                                                                                                             |
| Date Submitted by the Author: | 28-Nov-2018                                                                                                                                                                                                                                                                                                                                                                                                                                                                                                                                                                                                                                                                                                                                                                                                                                                                                                                                                                                                                                                                                                                                                                                                                                                                                                                                                                                                                                                                                                                                                                                                                                                                                                                                                                                                                                                                                                                                                                                                                                                                                                                                                                                                                                                                                                                                                                                                                          |
| Complete List of Authors:     | <p>Andrich, Silke; Heinrich-Heine-University Düsseldorf, Institute for Health Services Research and Health Economics, Centre for Health and Society, Faculty of Medicine; German Diabetes Center, Leibniz Center for Diabetes Research at the Heinrich-Heine-University Düsseldorf, Institute for Health Services Research and Health Economics</p> <p>Ritschel, Michaela; Heinrich-Heine-University Düsseldorf, Institute for Health Services Research and Health Economics, Centre for Health and Society, Faculty of Medicine</p> <p>Meyer, Gabriele; Martin Luther University Halle-Wittenberg, Institute for Health and Nursing Sciences, Medical Faculty</p> <p>Hoffmann, Falk; Carl von Ossietzky University, Department of Health Services Research, Faculty of Medicine and Health Sciences</p> <p>Stephan, Astrid; Martin Luther University Halle-Wittenberg, Institute for Health and Nursing Sciences, Medical Faculty</p> <p>Baltes, Marion; Martin Luther University Halle-Wittenberg, Institute for Health and Nursing Sciences, Medical Faculty</p> <p>Blessin, Juliane; Martin Luther University Halle-Wittenberg, Institute for Health and Nursing Sciences, Medical Faculty</p> <p>Jobski, Kathrin; Carl von Ossietzky University Oldenburg, Department of Health Services Research, Faculty of Medicine and Health Sciences</p> <p>Fassmer, Alexander; Carl von Ossietzky University Oldenburg, Department of Health Services Research, Faculty of Medicine and Health Sciences</p> <p>Haastert, Burkhard; mediStatistica</p> <p>Gontscharuk, Veronika; Heinrich-Heine-University Düsseldorf, Institute for Health Services Research and Health Economics, Centre for Health and Society, Faculty of Medicine</p> <p>Arend, Werner; Heinrich-Heine-University Düsseldorf, Institute for Health Services Research and Health Economics, Centre for Health and Society, Faculty of Medicine</p> <p>Theunissen, Lena; Heinrich-Heine-University Düsseldorf, Institute for Health Services Research and Health Economics, Centre for Health and Society, Faculty of Medicine</p> <p>Colley, Denise; Heinrich-Heine-University Düsseldorf, Institute for Health Services Research and Health Economics, Centre for Health and Society, Faculty of Medicine</p> <p>Hinze, Raoul; Heinrich-Heine-University Düsseldorf, Institute for Health Services Research and Health Economics, Centre for Health and Society,</p> |

|           |                                                                                                                                                                                                                                                                                                                                                                                                                                                                                                                                                                                                                                                                                                                                                                                                                                                                                         |
|-----------|-----------------------------------------------------------------------------------------------------------------------------------------------------------------------------------------------------------------------------------------------------------------------------------------------------------------------------------------------------------------------------------------------------------------------------------------------------------------------------------------------------------------------------------------------------------------------------------------------------------------------------------------------------------------------------------------------------------------------------------------------------------------------------------------------------------------------------------------------------------------------------------------|
|           | Faculty of Medicine<br>Thelen, Simon; University Hospital Düsseldorf, Department of Trauma and Hand Surgery<br>Fuhrmann, Petra; AOK Rheinland/Hamburg, Department Health Policy – Health Economics – Press Relations<br>Sorg, Christian; AOK Rheinland/Hamburg, Department Health Policy – Health Economics – Press Relations<br>Windolf, Joachim; University Hospital Düsseldorf, Department of Trauma and Hand Surgery<br>Rupprecht, Christoph J.; AOK Rheinland/Hamburg, Department Health Policy – Health Economics – Press Relations<br>Icks, Andrea; Heinrich-Heine-University Düsseldorf, Institute for Health Services Research and Health Economics, Centre for Health and Society, Faculty of Medicine; German Diabetes Center, Leibniz Center for Diabetes Research at the Heinrich-Heine-University Düsseldorf, Institute for Health Services Research and Health Economics |
| Keywords: | proximal femoral fracture, healthcare provision, patient-reported outcomes, data linkage                                                                                                                                                                                                                                                                                                                                                                                                                                                                                                                                                                                                                                                                                                                                                                                                |
|           |                                                                                                                                                                                                                                                                                                                                                                                                                                                                                                                                                                                                                                                                                                                                                                                                                                                                                         |

SCHOLARONE™  
Manuscripts

## Study protocol

### **Healthcare provision, functional ability and quality of life after proximal femoral fracture - ‘ProFem’: Study protocol of a population-based, prospective study based on individually linked survey and statutory health insurance data**

Silke Andrich<sup>1, 2\*</sup>, Michaela Ritschel<sup>1\*</sup>, Gabriele Meyer<sup>3</sup>, Falk Hoffmann<sup>4</sup>, Astrid Stephan<sup>3</sup>, Marion Baltes<sup>3</sup>, Juliane Blessin<sup>3</sup>, Kathrin Jobski<sup>4</sup>, Alexander M. Fassmer<sup>4</sup>, Burkhard Haastert<sup>1, 5</sup>, Veronika Gontscharuk<sup>1</sup>, Werner Arend<sup>1</sup>, Lena Theunissen<sup>1</sup>, Denise Colley<sup>1</sup>, Raoul Hinze<sup>1</sup>, Simon Thelen<sup>6</sup>, Petra Fuhrmann<sup>7</sup>, Christian G. G. Sorg<sup>7</sup>, Joachim Windolf<sup>6</sup>, Christoph J. Rupprecht<sup>7</sup>, Andrea Icks<sup>1, 2</sup>

\* Shared first authorship

<sup>1</sup> Institute for Health Services Research and Health Economics, Centre for Health and Society, Faculty of Medicine, Heinrich-Heine-University Düsseldorf, Düsseldorf, Germany

<sup>2</sup> Institute for Health Services Research and Health Economics, German Diabetes Center, Leibniz Center for Diabetes Research at the Heinrich-Heine-University Düsseldorf, Düsseldorf, Germany

<sup>3</sup> Martin Luther University Halle-Wittenberg, Institute for Health and Nursing Sciences, Medical Faculty, Halle (Saale), Germany

<sup>4</sup> Department of Health Services Research, Faculty of Medicine and Health Sciences, Carl von Ossietzky University Oldenburg, Germany

<sup>5</sup> mediStatistica, Neuenrade, Germany

<sup>6</sup> Department of Trauma and Hand Surgery, University Hospital Düsseldorf, Germany

<sup>7</sup> Department Health Policy – Health Economics – Press Relations, AOK Rheinland/Hamburg, Düsseldorf, Germany

Corresponding author

Dr. Silke Andrich

Institute for Health Services Research and Health Economics

Centre for Health and Society

Faculty of Medicine

Heinrich-Heine-University Düsseldorf

1  
2  
3 Moorenstr. 5

4  
5 40225 Düsseldorf, Germany

6  
7 Fon: +49 211 33 82 402; Fax: +49 211 33 82 677

8  
9 Email: silke.andrich@uni-duesseldorf.de

10  
11 **Keywords:** proximal femoral fracture, healthcare provision, patient-reported outcomes, data  
12 linkage  
13

14  
15 **Word count:** 3.993

16  
17  
18 **Tables:**

19  
20 Table 1 Overview of assessed parameters from SHI and questionnaire data

21  
22 Table 2 Precision of the estimators of the physical and mental component summary score (SF-  
23 36)  
24  
25

26  
27 **Figures:**

28  
29 Figure 1 Study design  
30  
31  
32  
33  
34  
35  
36  
37  
38  
39  
40  
41  
42  
43  
44  
45  
46  
47  
48  
49  
50  
51  
52  
53  
54  
55  
56  
57  
58  
59  
60

## Abstract

Introduction: Proximal femoral fractures (PFF) are among the most frequent fractures in older people. However, the situation of people with a PFF after hospital discharge is poorly understood. Our aim is to (1) analyse healthcare provision, (2) examine clinical and patient-reported outcomes (PROs), (3) describe clinical and sociodemographic predictors of these, and (4) develop an algorithm to identify subgroups with poor outcomes and a potential need for more intensive healthcare.

Methods and analysis: This is a population-based prospective study based on individually linked survey and statutory health insurance (SHI) data. All people aged minimum 60 who have been continuously insured with the AOK Rheinland/Hamburg and experience a PFF within one year will be consecutively included (SHI data analysis). Additionally, seven hundred people selected randomly from the study population will be consecutively invited to participate in the survey. Questionnaire data will be collected in the participants' private surroundings at three, six, and 12 months after hospital discharge. If the insured person considers themselves to be only partially or not at all able to take part in the survey, a proxy person will be interviewed where possible. SHI variables include healthcare provision, healthcare costs, and clinical outcomes. Questionnaire variables include information on PROs, lifestyle characteristics, and socio-economic status. We will use multiple regression models to estimate healthcare processes and outcomes including mortality and cost, investigate predictors, perform non-responder analysis, and develop an algorithm to identify vulnerable subgroups.

Ethics and dissemination: The study was approved by the ethics committee of the Faculty of Medicine, Heinrich-Heine-University Düsseldorf (approval reference 6128R). All participants including proxies providing written and informed consent can withdraw from the study at any time. The study findings will be disseminated through scientific journals and public information.

Registration details: The study has been registered with the German Clinical Trials Register (DRKS; DRKS00012554).

### Strengths and limitations of this study

- To the best of our knowledge, this is the first study to conduct an individual data linkage between statutory health insurance (SHI) data and questionnaire data in the field of research on proximal femoral fractures (PFF).
- Individually linked survey and SHI data is used to answer a variety of health service research, clinical, and patient-orientated questions in people with PFF.
- Vulnerable subgroups, such as people with dementia, are included in our study.
- Due to structural differences between populations insured with various SHI funds and regions, the generalisability of our findings might be limited.

## Introduction

Proximal femoral fractures (PFF) are among the most frequent fractures in older people (1, 2). However, knowledge about the situation of those affected by a PFF is scarce (3-5). Studies indicate poor outcomes following a PFF: 50% of those affected retained functional limitations (6), 15% were newly admitted to a nursing home (7), and around 20% died within one year (8). Although post-operative programmes showed positive effects (6-11), more than 60% of patients received no further treatment (6), suggesting shortcomings in the care provided. Specific aspects of healthcare provision, such as treatment in geriatric trauma centres or rehabilitation, have hardly been investigated. Existing international studies suggest a healthcare gap (6, 12). It is currently unclear as to which patients particularly benefit from specific care models (13). In addition to healthcare processes, patient-reported outcomes (PROs) such as health-related quality of life (HRQoL), functional ability, and social participation in older people following PFF have hardly been investigated. Subgroups characterised by particularly poor clinical and patient-reported outcomes, and by a potential need of more intensive care, have not yet been identified.

Therefore, the aims of this study are (1) to analyse healthcare provision after PFF, (2) to examine clinical outcomes (such as re-hospitalisation, occurrence of need for care, nursing home admission, death) and PROs (such as HRQoL, functional ability, social participation) after PFF, and (3) to describe clinical and sociodemographic predictors of these (such as comorbidity, age, sex, social support). In doing so, (4) the aim is to identify subgroups who have poor outcomes (e. g. people living at home with low social support, comorbidity, and high healthcare utilisation) and are potentially in need of more intensive healthcare. This will be done by developing an algorithm which generates a 'case finding'.

Our project is funded by the Innovation Fund coordinated by the Innovation Committee of the Federal Joint Committee (grant number: 01VSF16043).



## Methods and analysis

### *Study design and population*

This is a population-based prospective study based on statutory health insurance (SHI) data and questionnaire data collected from people insured with the AOK Rheinland/Hamburg. Overall, the AOK Rheinland/Hamburg covers more than 2.5 million insured people in North Rhine-Westphalia (NRW), which has the highest population of all German Federal States, with approximately 25% aged 60 or older. All people resident in NRW aged 60 or over and who have been continuously insured with the AOK Rheinland/Hamburg for at least 12 months prior to PFF and experience a PFF between January 2018 and January 2019 will be consecutively included in the study. People with PFF will be identified consecutively over one year along with their exact date of hospital discharge using SHI diagnoses (main or secondary diagnosis) and operational procedure keys. A fracture event is defined according to the 10<sup>th</sup> revision of the International Classification of Diseases (ICD-10) codes S72.0 (fracture of head and neck of femur), S72.1 (peritrochanteric femoral fracture), and S72.2 (subtrochanteric femoral fracture), and selected surgical, and procedural keys (OPS-Codes, see Appendix A).

This study comprises two populations: all identified people as described above belong to the 1) study population based on SHI data. For those, a comprehensive analysis of SHI data covering 12 months before and 12 months after the fracture event will be performed. Furthermore, a 2) random sample – drawn from the overall SHI study population – will be consecutively invited to additionally participate in a survey. An algorithm will be applied weekly to ensure a random selection of the survey sample. Questionnaire data collection is planned at three and 12 months after hospital discharge using Pen-and-Paper Personal Interviews (PAPI) with participants in a private surrounding, and at six months after discharge by means of a postal survey. Sufficient German language skills are a prerequisite for participation in the survey (Appendix B). If the insured person considers themselves to be only partially or not at all able to take part in the survey, e.g. due to dementia or reduced state of health, an attempt will be made to conduct the interview with a caregiving relative (person of trust) or a legal guardian either additionally or on behalf of the insured person. The following criteria will be used to identify an eligible proxy: they must know the insured person well, should visit the insured person twice a week on average, and support them in everyday life. The participation of the proxy is always voluntary. People no longer able to take part in the interviews themselves and with no eligible caregiving relative or legal guardian to perform a proxy interview with will be excluded (Appendix B).

1  
2  
3 Figure 1 displays the flow through the study. The sample size calculation will be described  
4 further below.  
5  
6

### 7 *Figure 1 Study design*

#### 8 **Recruitment**

9  
10  
11  
12 First contact to arrange an appointment for the visit in the private surrounding will be made by  
13 postal letter. The letter contains a cover letter, information on the study and on data protection,  
14 and the consent form for participation for prior information. The letter will also ask the insured  
15 person (or their proxy) to contact the study centre to arrange an appointment. A written reminder  
16 will be sent to non-responders after approximately two weeks, followed by telephone contact  
17 as a next step. Where no telephone number is available, a second reminder will be sent.  
18 Response will be monitored consecutively and proportions will be calculated to describe  
19 participation behaviour (14, 15).  
20  
21  
22  
23  
24  
25

#### 26 **Data Collection - Data Sources and Variables**

27  
28  
29 Data will be collected from the sources outlined above. SHI data collected from consenting  
30 individuals 12 months before and 12 months after the event will be individually linked to  
31 questionnaire data. The SHI data will be used to measure healthcare provision and clinical  
32 outcomes in the 12 months after PFF. Healthcare provision is described for various healthcare  
33 areas: inpatient and outpatient care, rehabilitation, nursing services, prescribed medication,  
34 remedies and medical aids as well as costs for the different healthcare areas, transportation, and  
35 costs in total. Clinical outcomes are re-hospitalisation, care dependency (including new  
36 occurrences), admission to a nursing home, and mortality. SHI data collected 12 months after  
37 PFF and 12 months before PFF will also be evaluated regarding predictors such as demographic  
38 characteristics and comorbidity. The questionnaire data will be used to record PROs, which  
39 focus on HRQoL, functional ability, social participation, pain, and fear of falling. Self-reported  
40 predictors include demographic characteristics as well as socio-economic status, social support,  
41 lifestyle, healthcare utilisation, and special health-related events. Questions on PROs should be  
42 answered by the insured person whenever possible. If the insured person is not able to respond  
43 to an abridged version of the questionnaire comprising the questions on the aforementioned  
44 PROs, the proxy will be asked to respond to the entire questionnaire except the questions on  
45 pain and fear of falling (please see Table 1). Interviews will be conducted by trained  
46 interviewers. An interviewer manual and standard operating procedures will be provided for  
47 quality assurance purposes and to ensure a standardised approach.  
48  
49  
50  
51  
52  
53  
54  
55  
56  
57  
58  
59  
60

## ***Outcomes***

The following variables will be recorded for the aforementioned purpose:

### SHI data

#### *Healthcare provision*

Healthcare provision will be evaluated using the following variables: number of hospital admissions after PFF; length of hospital stay (LOS) for each hospital admission; admission to a specialist department; physician contact per billing quarter; number and kind of different specialists involved; number, duration and kind of inpatient and/or outpatient rehabilitation; number, duration and kind of nursing services; institutional long-term care or short-term care; number and kind of prescribed medications; and number and kind of remedies and medical aids. Furthermore, healthcare costs will include: inpatient costs; outpatient costs; rehabilitation costs; nursing services costs; medication costs; costs for remedies and medical aids; and costs for transportation. Healthcare costs will be shown in euro. Since outpatient data is only provided in quarters, these cost values will be equally distributed over the time span (e.g. in weeks).

#### *Clinical Outcomes*

Re-hospitalisation is addressed by the variables already named above (number of hospital admissions after PFF, LOS for each hospital admission, and admission to a specialist department). Care dependency (including new occurrences) is displayed in five care degrees according to the German Nursing Care Act (1 to 5) depending on the amount of care needed (16). The maximum level of care in the period before the PFF hospital stay will be considered. Admission to a nursing home is assessed by the type of service, including e.g. provision of short-term or long-term care along with the exact date. The date of death of people with PFF who died during the observation period will be recorded to assess mortality.

### Questionnaire data

#### *Patient-reported outcomes (PROs)*

##### *Health-related quality of life*

Overall HRQoL will be measured using the 12-Item Short Form Health Survey (SF-12) covering the previous four weeks of a person's life (17). The SF-12 is the shorter version of the Short Form-36 Health Survey (SF-36) and contains one or two items for the following eight health dimensions: physical functioning; role functioning; bodily pain; general health

1  
2  
3 perception; energy/vitality; social functioning; emotional functioning; and mental health. The  
4 SF-12 comprises two summary scores – a physical component summary score (PCS) and a  
5 mental component summary score (MCS). In the SF-12, a better health-related quality of life  
6 is denoted by higher values. The SF-12 is one of the best-known and most frequently used  
7 instruments to assess HRQoL and its measurement performance has been tested (18).  
8  
9

10  
11  
12 The European Quality of Life 5-Dimensions questionnaire (EQ-5D) is a generic preference-  
13 based measure of health status and consists of two parts – a questionnaire and a visual analogue  
14 scale (EQ-VAS) (19, 20). The questionnaire contains five dimensions: mobility, self-care, usual  
15 activities, pain/discomfort, and anxiety/depression. Each dimension is rated on a 5-level (5L)  
16 scale. The result of the questionnaire can be summarised as perceived state of health (from best  
17 to worst state where “11111” is the best and “55555” the worst state). The EQ-VAS is a scale  
18 for rating health between 100 (best imaginable state of health) and zero (worst imaginable state  
19 of health), expressing health on the day of completion. The EQ-5D is a well-accepted and  
20 frequently used instrument with good psychometric properties (21).  
21  
22  
23  
24  
25  
26  
27  
28

### 29 *Functional ability*

30  
31 Functional ability will be measured using three instruments.  
32  
33

34 The Oxford Hip Score (OHS) is a hip-specific 12-item questionnaire to assess activities of daily  
35 living (ADL) with six questions relating to pain (type and the resulting impairments in mobility)  
36 and six questions relating to functional ability (self-care, mobility, and independence), each  
37 referring to the last four weeks (22, 23). Answers to the questions are categorised in five  
38 dimensions, ranging from 0 (worst outcome) to 4 (best outcome). The sum of all values provides  
39 an overall score between 0 and 48. A high overall score indicates a better outcome with 48  
40 being the best outcome. The reliability and validity of the OHS has been assessed in a German  
41 population with osteoarthritis of the hip (24).  
42  
43  
44  
45  
46  
47  
48

49 The Heuschmann et al. (2005) (25) version of the Barthel Index (BI), a common measure of  
50 ADL, provides an interview and a paper and pencil form. The BI comprises ten domains which  
51 are divided into self-care and mobility. Self-care includes feeding, bathing, grooming, dressing,  
52 toilet use, and bowel and bladder control. Mobility consists of transfer, mobility, and stairs. The  
53 interview version comprises 17 questions. The postal survey includes ten questions – one for  
54 each domain. The person’s overall ADL score is classified according to an ordinal scale where  
55 0 is the lowest score and 20 indicates complete independence. Comprehensibility and reliability  
56 of both questionnaires were tested in stroke patients (25).  
57  
58  
59  
60

1  
2  
3 Pre-fracture functional level will be assessed using the Mobility Parker Score (MPS) (26),  
4 which evaluates a person's ability to get about the house, out of the house, and to go shopping.  
5 Each item is rated from 0 ('no difficulty') to 3 ('not at all'). The answers result in a total score  
6 ranging from 'no walking ability at all' to 'total independence' (0-9).  
7  
8  
9

### 10 *Social Participation*

11  
12  
13 The Index for Measuring Participation Restrictions (IMET) measures the restriction of  
14 participation of people with different chronic diseases (27, 28). Based on the dimensions of the  
15 International Classification of Functioning, Disability and Health (ICF), this tool covers nine  
16 aspects of everyday activities and participation. This includes self-care, daily duties, and  
17 responsibilities at and outside home, recreation, social activities, personal relations, sex, and  
18 stress and extraordinary strains. The impairment caused by a disease is evaluated for each item  
19 by means of an 11-level scale (0 - 10). Lower IMET values suggest better social participation.  
20 A summary score can be calculated. The psychometric properties have been tested for different  
21 patient groups (28).  
22  
23  
24  
25  
26  
27  
28  
29

### 30 *Pain*

31  
32 Pain will be recorded as follows: the current level of pain, the average level of pain during the  
33 last four weeks and the highest level of pain during the last four weeks will be rated on a  
34 numerical rating scale (1 - 5) (29).  
35  
36  
37

### 38 *Fear of falling and falls*

39  
40  
41 The assessment of fear of falling (30) includes a question about occurrence and frequency of  
42 fear (31), and a question about the occurrence and frequency of activities avoided due to fear  
43 of falling (31). The number and frequency of falls are recorded over the 12 months prior to the  
44 fracture as well as the period after the fracture (32, 33). A single question is used to determine  
45 whether it is the first fracture.  
46  
47  
48  
49

50  
51 Overall, we considered the recent recommendations regarding core outcomes and appropriate  
52 instruments to be used in trials with older people with hip fractures (34, 35, 36). We selected  
53 instruments that are suitable for personal interviews, postal survey, and proxy assessments. We  
54 decided for the SF-12 instead of the SF-36 to reduce the length of the questionnaire (34).  
55  
56  
57  
58  
59  
60

## ***Predictors***

### SHI data

#### *Demographic characteristics and comorbidity*

Age, sex, and region of residence will be considered. Comorbidity, number of prescribed medications, number of inpatient stays in hospital, level of care, and healthcare costs for the year prior to the fracture will be considered as possible predictors 12 months before PFF. Age will be defined by the year of the fracture event and classified into five-year age groups. Region of residence will be denoted by the first two numbers of the postcode. Additionally, overall comorbidity-related disease burden will be assessed using the enhanced Charlson comorbidity index for ICD-10 codes (37, 38). In accordance with previous studies (39-42), the Charlson comorbidity index will be calculated using inpatient diagnoses 52 weeks before (<) the index week and outpatient diagnoses four quarters before (<) the index quarter. A score variable will sum up and categorise comorbidities from 0, 1, 2-3, 4-5, and 6+.

### Questionnaire data

#### *Demographic characteristics*

The assessment of demographic characteristics comprises marital status, nationality, and country of birth.

#### *Socio-economic status*

The socio-economic status includes education and income. Education will be recorded based on the International Standard Classification of Education (ISCED). Education level is grouped into three categories ranging from low to high (43). Income will be determined by the equivalised disposable income. For this purpose, the net household income will be recorded by providing 15 categories of income, the household size, and the number of people living in the household including information regarding sex, age, and relationship to the participant (33). The number of children, professional position, indication of professional activity, and information on the current employment situation will also be assessed. Subjective social status will be rated using a 10 rung self-anchoring scale in the form of a ladder (44, 45).

#### *Social support*

Social support will be captured by using the Oslo Social Support Scale, which consists of three questions regarding close people to rely on; other people's concern and interest in the

1  
2  
3 participant's life; and ease of obtaining help from neighbours (46). Answers will be scored from  
4 1 to 4 or 5. The individual values will be added to a total score, which can have values between  
5 3 and 14 with higher values indicating higher social support (47).  
6  
7

### 8 9 *Lifestyle factors*

10  
11 Questions regarding lifestyle factors include: physical activity (33, 48); smoking status, and if  
12 applicable the amount of cigarettes, cigars, pipes, and cigarillos smoked per day (49, 50);  
13 alcohol consumption and binge drinking (33). Height and weight will be recorded as  
14 anthropometric measures.  
15  
16  
17

### 18 19 *Healthcare utilisation*

20  
21 Intake and use of medication will be recorded within five questions to assess healthcare  
22 utilisation beyond SHI data. Participants will be asked about their current intake of analgesics,  
23 use of over the counter medication, and the presence of a medication plan. Photographs will be  
24 taken of the plan or drug package(s) and a question asked about who is responsible for drug  
25 preparation. It will also be assessed if medications are administered long-term or prescribed as  
26 needed. Furthermore, the current pattern of use of remedies and medical aids and their  
27 possession before the fracture will be recorded using different pictures of remedies and medical  
28 aids (51).  
29  
30  
31  
32  
33  
34  
35

### 36 37 *Special health-related events*

38  
39 The assessment of special negative and positive health-related events as significant incidents  
40 comprises the previous six-month period and the last seven days. Participants will be asked if  
41 they experienced any positive or negative events and if so, which events can be named (52).  
42  
43  
44

45 Table 1 provides an overview of all assessed parameters from SHI and questionnaire data.  
46  
47  
48  
49  
50  
51  
52  
53  
54  
55  
56  
57  
58  
59  
60



| Category | Source of Data                              | Acquisition of                                                  | Instruments/Variables                                                                                                                                                | 12 Month before PFF      | 3 Month    | 6 Month | 12 Month |   |
|----------|---------------------------------------------|-----------------------------------------------------------------|----------------------------------------------------------------------------------------------------------------------------------------------------------------------|--------------------------|------------|---------|----------|---|
|          |                                             |                                                                 |                                                                                                                                                                      |                          | after PFF  |         |          |   |
| Outcomes | Statutory Health Insurance Data (SHI data)  | <b>Healthcare provision</b>                                     |                                                                                                                                                                      |                          | Continuous |         |          |   |
|          |                                             | Inpatient care                                                  | Number of hospital admissions, length of hospital stay, admission to a specialist department                                                                         |                          |            |         |          |   |
|          |                                             | Outpatient care                                                 | Physician contact per billing quarter (yes/no), number and kind of specialists involved                                                                              |                          |            |         |          |   |
|          |                                             | Rehabilitation                                                  | Number, duration and kind of inpatient/outpatient rehabilitation                                                                                                     |                          |            |         |          |   |
|          |                                             | Nursing services                                                | Number, duration and kind of nursing services/institutional long-term care/short-term care                                                                           |                          |            |         |          |   |
|          |                                             | Prescribed medication                                           | Number and kind of prescribed medication                                                                                                                             |                          |            |         |          |   |
|          |                                             | Remedies and medical aids                                       | Number and kind of remedies and medical aids                                                                                                                         |                          |            |         |          |   |
|          |                                             | Costs                                                           | Inpatient costs, outpatient costs, rehabilitation costs, nursing services costs, medication costs, costs for remedies and medical aids, and costs for transportation |                          |            |         |          |   |
|          |                                             | <b>Clinical outcomes</b>                                        |                                                                                                                                                                      |                          |            |         |          |   |
|          |                                             | Re-hospitalisation                                              | Number of hospital admissions, length of hospital stay, admission to a specialist department                                                                         |                          |            |         |          |   |
|          | Care dependency (including new occurrences) | Level of care                                                   |                                                                                                                                                                      |                          |            |         |          |   |
|          | Admission to a nursing home                 | Type of service, date of admission                              |                                                                                                                                                                      |                          |            |         |          |   |
|          | Mortality                                   | Date of death                                                   |                                                                                                                                                                      |                          |            |         |          |   |
|          |                                             | Questionnaire data                                              | <b>Patient-reported outcomes</b>                                                                                                                                     |                          |            |         |          |   |
|          |                                             |                                                                 | Health-related quality of life                                                                                                                                       | SF-12 <sup>1, 2, 3</sup> |            | X       | X        | X |
|          | EQ-5D <sup>1, 2, 3</sup>                    |                                                                 |                                                                                                                                                                      |                          | X          | X       | X        |   |
|          | Functional ability                          |                                                                 | Oxford Hip Score <sup>1, 3</sup>                                                                                                                                     |                          | X          | X       | X        |   |
|          |                                             |                                                                 | Barthel Index <sup>1, 3</sup>                                                                                                                                        |                          | X          | X       | X        |   |
|          |                                             |                                                                 | Mobility Parker Score <sup>1, 3</sup>                                                                                                                                |                          | X          |         |          |   |
|          | Social participation                        | IMET <sup>1, 2, 3</sup>                                         |                                                                                                                                                                      | X                        | X          | X       |          |   |
|          | Pain                                        | Numeric rating scale of the German Pain Society <sup>1, 2</sup> |                                                                                                                                                                      | X                        | X          | X       |          |   |



|                                      |                                                                                               |                                    |                                                                                                                                                                                  |   |   |   |   |
|--------------------------------------|-----------------------------------------------------------------------------------------------|------------------------------------|----------------------------------------------------------------------------------------------------------------------------------------------------------------------------------|---|---|---|---|
|                                      |                                                                                               | Fear of falling and falls          | Occurrence and frequency of fear of falling <sup>1,2</sup> , occurrence and frequency of fear-related avoidance of activities <sup>1,2</sup> , frequency of falls <sup>1,3</sup> |   | X | X | X |
| Predictors                           | SHI data                                                                                      | <b>Demographic characteristics</b> | Age, sex, region of residence                                                                                                                                                    |   | X |   |   |
|                                      |                                                                                               | <b>Comorbidity</b>                 | Number of prescribed medication                                                                                                                                                  | X |   |   |   |
|                                      |                                                                                               |                                    | Number of inpatient stays                                                                                                                                                        |   |   |   |   |
|                                      |                                                                                               |                                    | Level of care                                                                                                                                                                    |   |   |   |   |
|                                      |                                                                                               |                                    | Costs                                                                                                                                                                            |   |   |   |   |
|                                      |                                                                                               | Charlson comorbidity index         |                                                                                                                                                                                  |   |   |   |   |
|                                      | Questionnaire data                                                                            | <b>Demographic characteristics</b> | Marital status <sup>1,3</sup>                                                                                                                                                    |   | X |   | X |
|                                      |                                                                                               |                                    | Nationality <sup>1,3</sup>                                                                                                                                                       |   | X |   |   |
|                                      |                                                                                               |                                    | Country of birth <sup>1,3</sup>                                                                                                                                                  |   | X |   |   |
|                                      |                                                                                               | <b>Socio-economic status</b>       | Level of education (ISCED) <sup>1,3</sup>                                                                                                                                        |   | X |   |   |
|                                      |                                                                                               |                                    | Equivalised disposable income <sup>1,3</sup>                                                                                                                                     |   | X |   | X |
|                                      |                                                                                               |                                    | Subjective social status using MacArthur scale (German version) <sup>1,2,3</sup>                                                                                                 |   | X |   | X |
|                                      |                                                                                               | <b>Social support</b>              | Oslo Social Support Scale <sup>1,2,3</sup>                                                                                                                                       |   | X |   | X |
|                                      |                                                                                               | <b>Lifestyle factors</b>           | Physical activity, smoking status, alcohol consumption <sup>1,3</sup>                                                                                                            |   | X |   | X |
|                                      | Height, weight (anthropometry) <sup>1,3</sup>                                                 |                                    |                                                                                                                                                                                  | X |   | X |   |
| <b>Health care utilisation</b>       | Intake and use of medication <sup>1,3</sup> , use of remedies and medical aids <sup>1,3</sup> |                                    | X                                                                                                                                                                                |   | X |   |   |
| <b>Special health-related events</b> | Positive and negative health-related events <sup>1,3</sup>                                    |                                    | X                                                                                                                                                                                |   | X |   |   |

<sup>1</sup> = participant; <sup>2</sup> = participant who is only partially able to take part in the survey; <sup>3</sup> = proxy

Table 1 Overview of assessed parameters from SHI and questionnaire data

### Sample size

According to data from the year 2014 provided by the AOK Rheinland/Hamburg, at least 4,000 insured people aged 60 or over are expected to experience a PFF within 12 months. Of these, 700 randomly selected people will be consecutively invited to participate in the survey. The sample size should make it possible to show specific healthcare provision (rehabilitation, treatment, and medical care), and outcomes in relevant subgroups (age, sex, migration background, various social contexts). The data currently available from literature is insufficient for performing a detailed calculation of sample size. However, age and sex specific estimates are available for HRQoL (53), mortality (8), and rehabilitation (54). The precision of the estimates of these parameters has been examined a priori, assuming the expected 4,000 people with PFF and the random sample of  $n = 700$  based on the age and sex distribution of the insured population of AOK Rheinland/Hamburg in 2014. The aim is to achieve a response of 80% of the target population. A dropout of 20% is expected after 12 months, including participants who die (approx. 20%) (8). This results in 448 ( $= 0.8 \cdot 0.8 \cdot 700$ ) participants after 12 months. The precision of the estimators was evaluated by calculating the PCS and MCS for HRQoL based on the sample size stratified by age and sex. From the results presented in Table 2, it can be concluded that the sample size provides sufficient accuracy for estimating HRQoL. It will be possible to identify differences between men and women and age groups. If the observed response considerably differs from the expected response we will adjust the number of weekly contacted persons up to exhausting the whole SHI study population.

|            | N = 700* | SD for PCS, MCS | Estimator PCS | 95%-CI (PCS) | Estimator MCS | 95%-CI (MCS) |
|------------|----------|-----------------|---------------|--------------|---------------|--------------|
| <b>Age</b> |          |                 |               |              |               |              |
| <80        | 163      | 10              | 41.6          | (40.1-43.1)  | 41.7          | (40.2-43.2)  |
| >=80       | 285      | 10              | 35.3          | (34.1-36.5)  | 38.8          | (37.6-40.0)  |
| <b>Sex</b> |          |                 |               |              |               |              |
| Men        | 126      | 10              | 41.2          | (39.5-42.9)  | 41.0          | (39.3-42.7)  |
| Women      | 322      | 10              | 36.9          | (35.8-38.0)  | 39.8          | (38.7-40.9)  |

SD = standard deviation; PCS = physical component summary score; MCS = mental component summary score; CI = confidence interval; \*n = 448 after 12 months

Table 2 Precision of the estimators of the physical and mental component summary score (SF-36)

### *Planned statistical analysis*

Depending on the research question, statistical analyses are carried out using either 1) SHI data or 2) SHI data and questionnaire data, which are combined to a linkage dataset. In general, the SHI population of all identified PFF patients and the survey sample will be described using baseline variables by prevalence (with 95% confidence interval (CI)), means, medians, standard deviations (SD) or percentiles depending on their distributions.

The variables of healthcare provision will be investigated using descriptive methods. Furthermore, healthcare provision will be evaluated by latent class analysis (LCA) and latent transition analysis (LTA). LCA is a modelling technique used to categorise participants into a number of unique (unobserved) classes. Participants are homogeneous with respect to their healthcare utilisation within each latent class and heterogeneous between classes. LCA typically uses cross-sectional data to identify subgroups at a single time point. LTA is an extension of LCA using longitudinal data where individuals transition between latent classes over time (55). Healthcare costs will be displayed in euro and categorised in approximately quintile classes. Calculations of total mean costs and mean costs per component and a 95% bootstrap CI will be performed.

Clinical outcomes will be analysed using Kaplan-Meier survival curves and Cox regression. Two analyses will be conducted regarding mortality, the first for the entire SHI study population, the second for the survey sample addressing the prognosis for people who have already survived at least three months. The mortality of the SHI study population will be compared to the German population  $\geq 60$  years. Age and sex-specific relative mortality rates will be calculated. Standardised mortality ratios (SMR) and comparative mortality figures (CMF) will be estimated together with 95% CI.

PROs will be studied using stratified descriptive analysis. Among others, outcomes related to PROs will be considered separately according to dementia status and state of health. Graphical or regression methods will be used to describe and exploratively estimate the association between paired self-reported and proxy values in the subpopulation of participants with dementia/reduced state of health.

Possible predictors to healthcare provision, clinical, and patient-reported outcomes will be investigated using mixed linear or logistic regression models, depending on the distribution of outcomes. Furthermore, two-part models (56-58) will be used to investigate associations within

1  
2  
3 cost analysis. Repeated measurements per participant will be adjusted by random effects in the  
4 mixed models.  
5  
6

7 At least one binary indicator for ‘severe cases’ will be derived from the outcomes. Different  
8 competing definitions for ‘severe cases’ could be combined in order to choose the final  
9 indicator. Furthermore, a latent class or latent transition analysis including different variables  
10 might be considered. An algorithm will be derived from one half of the study population based  
11 on the binary case indicator using logistic regression models with independent variables  
12 selected from the baseline variables to classify the risk of a ‘severe case’ after PFF. A final  
13 selection of variables for the algorithm will be made using goodness of fit criteria and stepwise,  
14 forward, and backward selection procedures. A score will be derived via the final model and  
15 tested with the other half of the study population (randomly chosen).  
16  
17  
18  
19  
20  
21  
22

23 Furthermore, a non-responder analysis will be performed based on individual SHI data,  
24 available for responders and non-responders. Descriptive statistics and corresponding statistical  
25 tests will be used to describe response at all observation intervals. Logistic regression analysis  
26 with subsequent multiple adjustment will be used to obtain (adjusted) odds ratios for belonging  
27 to the response group.  
28  
29  
30  
31  
32

33 The study and the data linkage will be performed in line with Good Epidemiological Practice  
34 (GEP) (59), Good Practice of Secondary Data Analysis (GPS) (60), and in accordance with the  
35 REporting of studies Conducted Using Observational Routinely-Collected Health Data  
36 (RECORD) Statement (61), and the Standard for Secondary Data Analyses (62). The data  
37 linkage of questionnaire and SHI data will be performed on an individual level using suitable  
38 key variables.  
39  
40  
41  
42  
43

## 44 **Discussion and practical implications**

45  
46 The results of the study may contribute to improving older people’s health-related quality of  
47 life, functional ability, and social participation as well as to the reduction of costs associated  
48 with the avoidable need of care, and hospitalisation after PFF.  
49  
50  
51

## 52 **Conclusion**

53  
54 To our knowledge this is the first study to investigate questions regarding healthcare provision,  
55 health-related quality of life, functional ability, and social participation after PFF. The strength  
56 of our study is the linkage of SHI and questionnaire data as well as the consideration of  
57 important vulnerable subgroups, such as people with dementia.  
58  
59  
60

## Ethics and dissemination

The study was approved by the responsible ethics committee of the Faculty of Medicine, Heinrich-Heine-University Düsseldorf (approval reference 6128R). All participants will provide written and informed consent and can withdraw from the study at any time. All procedures performed will be in accordance with the Declaration of Helsinki and comparable ethical standards (e.g., GEP and GPS). The data protection agreement applied for this study does not cover posting data in public databases. Data will be held at the IVG and mediStatistica. The development of this study protocol was guided by the Standard Protocol Items: Recommendations for Interventional Trials (SPIRIT) statement and the SPIRIT-PRO Extension, where applicable (63-65). The results of the project will help to identify possible shortcomings in the care of older people with PFF and detect people with special needs of care. The findings of the study will be disseminated through scientific journals and public information.

## References

1. Ballane G, Cauley JA, Luckey MM, Fuleihan GE-H. Secular trends in hip fractures worldwide: Opposing Trends East Versus West. *J Bone Miner Res.* 2014;29(8):1745–55.
2. Icks A, Arend W, Becker C, Rapp K, Jungbluth P, Haastert B. Incidence of hip fractures in Germany, 1995–2010. *Arch Osteoporos.* 2013;8:140.
3. Griffin XL, Parsons N, Achten J, Fernandez M, Costa ML. Recovery of health-related quality of life in a United Kingdom hip fracture population: The Warwick Hip Trauma Evaluation - a prospective cohort study. *Bone Joint J.* 2015;97-B(3):372–82.
4. Martin-Martin LM, Arroyo-Morales M, Sanchez-Cruz JJ, Valenza-Demet G, Valenza MC, Jimenez-Moleon JJ. Factors influencing performance-oriented mobility after hip fracture. *J Aging Health.* 2015;27(5):827–42.
5. Sletvold O, Helbostad JL, Thingstad P, Taraldsen K, Prestmo A, Lamb SE, Aamodt A, Johnsen R, Magnussen J, Saltvedt I. Effect of in-hospital comprehensive geriatric assessment (CGA) in older people with hip fracture. The protocol of the Trondheim Hip Fracture Trial. *BMC Geriatr.* 2011;11:18.
6. Stenvall M, Olofsson B, Nyberg L, Lundström M, Gustafson Y. Improved performance in activities of daily living and mobility after a multidisciplinary postoperative rehabilitation in older people with femoral neck fracture: A randomized controlled trial with 1-year follow-up. *J Rehabil Med.* 2007;39(3):232–8.
7. Ohmann C, Smektala R, Pientka L, Paech S, Neuhaus E, Rieger M, Schwabe W, Debold P, Jonas M, Hupe K, Bücken-Nott HJ, Giani G, Szucs TD. [A New Model of Comprehensive Data Linkage – Evaluation of its Application in Femoral Neck Fracture]. *Z. ärztl. Fortbild. Qual. Gesundh.wes.* 2005;99(9):547–54.
8. Smektala R, Ohmann C, Paech S, Neuhaus E, Rieger M, Schwabe W, Debold P, Deimling A, Jonas M, Hupe K, Bücken-Nott HJ, Giani G, Szucs TD, Pientka L. [On the prognosis of hip fractures. Assessment of mortality after hip fractures by analyzing longitudinal data from acute and rehabilitative care]. *Unfallchirurg.* 2005;108(11):927–37.
9. Cameron ID, Handoll HH, Finnegan TP, Madhok R, Langhorne P. Co-ordinated multidisciplinary approaches for inpatient rehabilitation of older patients with proximal femoral fractures. *Cochrane Database Syst Rev.* 2001(3):CD000106.

10. Handoll HHG, Cameron ID, Mak JCS, Finnegan TP. Multidisciplinary rehabilitation for older people with hip fractures. *Cochrane Database SystRev*. 2009(4):CD007125.
11. Lögters T, Hakimi M, Linhart W, Kaiser T, Briem D, Rueger J, Windolf J. [Early interdisciplinary geriatric rehabilitation after hip fracture. Effective concepts or just transfer of costs?]. *Unfallchirurg*. 2008;111:719-726.
12. Morrison R & Siu AL. A Comparison of pain and its treatment in advanced dementia and cognitively intact patients with hip fracture. *J Pain Symptom Manage*. 2000;19(4):240-8.
13. Pioli G, Giusti A & Barone A. Orthogeriatric care for the elderly with hip fractures: where are we? *Aging Clin Exp Res*. 2008; 20(2):113-22.
14. Slattery ML, Edwards SL, Caan BJ, Kerber RA, Potter JD. Response Rates among Control Subjects in Case-Control Studies. *Ann Epidemiol*. 1995;5(3):245-249.
15. Stang A, Moebus S, Dragano N, Beck EM, Möhlenkamp S, Schmermund A, Siegrist J, Erbel R, Jöckel KH, Heinz Nixdorf Recall Study Investigation Group. Baseline recruitment and analyses of nonresponse of the Heinz Nixdorf Recall Study: Identifiability of phone numbers as the major determinant of response. *European Journal of Epidemiology*. 2005;20:489–496.
16. Kimmel A & Breuninger K. Pflegereform 2017. [Reform of the German Long-Term Care Insurance. A New Definition of Care Dependency and a New System to Assess the Need for Long-Term Care]. *Gesundheitswesen* 2016;78(07):477-488.
17. Ware J Jr, Kosinski M & Keller SD. A 12-Item Short-Form Health Survey: construction of scales and preliminary tests of reliability and validity. *Medical care*. 1996;34(3):220-33.
18. Morfeld M, Kirchberger I & Bullinger, M. SF-36 – Fragebogen zum Gesundheitszustand. Deutsche Version des Short Form-36 Health Survey. 2., ergänzte und überarbeitete Auflage, 2011, Hogrefe Verlag, Göttingen.
19. Brooks R. EuroQol: the current state of play. *Health Policy*. 1996;37(1):53–72.
20. Herdman M, Gudex C, Lloyd A, Janssen MF, Kind P, Parkin D, Bonsel G, Badia X. Development and preliminary testing of the new five-level version of EQ-5D (EQ-5D-5L). *Quality of Life Research*, 2011;20:1727–1736.



- 1  
2  
3 21. Nemeth G. Health related quality of life outcome instruments. *European spine journal*:  
4 official publication of the European Spine Society, the European Spinal Deformity  
5 Society, and the European Section of the Cervical Spine Research Society. 2006;15 Suppl  
6 1:S44-51.  
7  
8  
9
- 10  
11 22. Dawson J, Fitzpatrick R, Carr A, Murray D. Oxford hip score: Questionnaire on the  
12 perceptions of patients about total hip replacement. *Journal of Bone and Joint Surgery*.  
13 1996; British Volume, 78, 185–190.  
14  
15
- 16  
17 23. Dawson J, Fitzpatrick R, Churchman D, Verjee-Lorenz A, Clayson D. User Manual for  
18 the Oxford Hip Score (OHS). Version 1.0, August 2010. Oxford University Innovation  
19 Limited.  
20  
21
- 22  
23 24. Naal FD, Sieverding M, Impellizzeri FM, von Knoch F, Mannion AF, Leunig M.  
24 Reliability and Validity of the Cross-Culturally Adapted German Oxford Hip Score. *Clin*  
25 *Orthop Relat Res*. 2009;467:952–957.  
26  
27
- 28  
29 25. Heuschmann PU, Kolominsky-Rabas PL, Nolte CH, Hünemann G, Ruf HU, Laumeier I,  
30 Meyrer R, Alberti T, Rahmann A, Kurth T, Berger K. [The Reliability of the German  
31 Version of the Barthel-Index and the Development of a Postal and Telephone Version for  
32 the Application on Stroke Patients]. *Fortschr Neurol Psychiat*. 2005;73:74-82.  
33  
34
- 35  
36 26. Parker MJ & Parker CR. A new mobility score for predicting mortality after hip fracture. *J*  
37 *Bone Joint Surg*. 1993;75-B:797-8.  
38  
39
- 40  
41 27. Deck R, Borowski C, Mittag O, Hüppe A, Raspe H. IMET (Index zur Messung von  
42 Einschränkungen der Teilhabe). Erste Ergebnisse eines ICF-orientierten  
43 Assessmentinstruments. *DRV-Schriften*. 2006;64:152-153.  
44  
45
- 46  
47 28. Deck R, Mittag O, Hüppe A, Muche-Borowski C, Raspe H. Index zur Messung von  
48 Einschränkungen der Teilhabe (IMET) – Erste Ergebnisse eines ICF-orientierten  
49 Assessmentinstruments. *Praxis Klinische Verhaltensmedizin und Rehabilitation*.  
50 2007;76:113-120.  
51  
52
- 53  
54 29. Deutsche Schmerzgesellschaft e.V. Deutscher Schmerz-Fragebogen Version 2015.2.  
55 Available from: <http://www.dgss.org/schmerzfragebogen/>. Accessed August 15, 2017.  
56  
57
- 58  
59 30. Kempen GIJM, van Haastregt JCM, McKee KJ, Delbaere K, Zijlstra, GAR. Socio-  
60 demographic, health-related and psychosocial correlates of fear of falling and avoidance



- 1  
2  
3 of activity in community-living older persons who avoid activity due to fear of falling.  
4 BMC Public Health. 2009;9:170. 26.  
5  
6  
7  
8 31. Zijlstra GA, van Haastregt JC, van Eijk JT, van Rossum E, Stalenhoef PA, Kempen GI.  
9 Prevalence and correlates of fear of falling, and associated avoidance of activity in the  
10 general population of community-living older people. *Age and Ageing*. 2007;36 (3):304–  
11 309.  
12  
13  
14  
15 32. Rapp K, Freiberger E, Todd C, Klenk J, Becker C, Denking M, Scheidt-Nave C, Fuchs  
16 J. Fall incidence in Germany: results of two population-based studies, and comparison of  
17 retrospective and prospective falls data collection methods. *BMC Geriatr*. 2014, 14:105.  
18  
19  
20  
21 33. Robert Koch Institut. Gesundheitsfragebogen 18 bis 64 Jahre (Studie zur Gesundheit  
22 Erwachsener in Deutschland - DEGS). März 2009.  
23  
24  
25  
26 34. Haywood KL & Griffin XL, Achten J, Costa ML. Developing a core outcome set for hip  
27 fracture trials. *Bone Joint J*. 2014;96-B:1016–23.  
28  
29  
30  
31 35. Haywood KL, Brett J, Tutton E, Staniszewska S. Patient-reported outcome measures in  
32 older people with hip fracture: a systematic review of quality and acceptability. *Qual Life*  
33 *Res*. 2017;26:799–812.  
34  
35  
36 36. Liem IS, Kammerlander C, Suhm N, Blauth M, Roth T, Gosch M, Hoang-Kim A,  
37 Mendelson D, Zuckerman J, Leung F, Burton J, Moran C, Parker M, Giusti A, Pioli G,  
38 Goldhahn J, Kates, SL. Identifying a standard set of outcome parameters for  
39 the evaluation of orthogeriatric co-management for hip fractures. *Injury*. 2013;44(11):  
40 1403–1412.  
41  
42  
43  
44  
45 37. Quan H, Sundararajan V, Halfon P, Fong A, Burnand B, Luthi JC, Saunders LD, Beck  
46 CA, Feasby TE, Ghali WA. Coding Algorithms for Defining Comorbidities in ICD-9-CM  
47 and ICD-10 Administrative Data. *Med Care*. 2005;43(11):1130–9.  
48  
49  
50  
51 38. Sundararajan V, Henderson T, Perry C, Muggivan A, Quan H, Ghali WA. New ICD-10  
52 version of the Charlson comorbidity index predicted in-hospital mortality. *J Clin*  
53 *Epidemiol*. 2004;57(12):1288–94.  
54  
55  
56  
57 39. Toson B, Harvey LA & Close JC. The ICD-10 Charlson Comorbidity Index predicted  
58 mortality but not resource utilization following hip fracture. *J Clin Epidemiol*.  
59 2015;68(1):44–51.  
60

- 1  
2  
3 40. Klabunde CN, Potosky AL, Legler JM, Warren JL. Development of a comorbidity index  
4 using physician claims data. *J Clin Epidemiol*. 2000;53(12):1258–67.  
5  
6  
7 41. Reyes C, Estrada P, Nogués X, Orozco P, Cooper C, Diez-Pérez A, Formiga F, González-  
8 Macias J, Prieto-Alhambra D. The impact of common co-morbidities (as measured using  
9 the Charlson index) on hip fracture risk in elderly men: a population-based cohort study.  
10 *Osteoporos Int*. 2014;25(6):1751–8.  
11  
12  
13 42. Lix LM, Quail J, Teare G, Acan B. Performance of comorbidity measures for predicting  
14 outcomes in population-based osteoporosis cohorts. *Osteoporos Int*. 2011;22(10):2633–  
15 43.  
16  
17  
18 43. Avendano M, Jurges H & Mackenbach JP. Educational level and changes in health across  
19 Europe: longitudinal results from SHARE. *J Eur Soc Policy*. 2009;19(4):301–316.  
20  
21  
22 44. Singh-Manoux A, Adler NE & Marmot MG. Subjective social status: its determinants and  
23 its association with measures of ill-health in the Whitehall II study. *Soc Sci Med*.  
24 2003;56(6):1321-33.  
25  
26  
27 45. Hoebel J, Mueters S, Kuntz B, Lange C, Lampert T. [Measuring subjective social status in  
28 health research with a German version of the MacArthurs Scale]. *Bundesgesundheitsbl*.  
29 2015;58:749-757.  
30  
31  
32 46. Kocalevent R & Brähler E (2014). Psychologische und sozial-wissenschaftliche  
33 Kurzskaalen. In: Kemper C, Brähler E, Zenger M (Hrsg.). 1. Aufl. Berlin: Medizinisch  
34 Wissenschaftliche Verlagsgesellschaft mbH & Co. KG, S. 216-219.  
35  
36  
37 47. Van Lente E, Barry MM, Molcho M, Morgan K, Watson D, Harrington J, Mc Gee H.  
38 Measuring population mental health and social well-being. *International Journal of Public*  
39 *Health*. 2012;57(2):421-430.  
40  
41  
42 48. Lampert T, Mensink GBM & Müters S. [Physical and sporting activity among adults in  
43 Germany. Results from the “German Health Update 2009” survey]. *Bundesgesundheitsbl*.  
44 2012;55:102-110.  
45  
46  
47 49. Jöckel KH, Lehmann N, Jaeger BR, Moebus S, Möhlenkamp S, Schmermund A, Dragano  
48 N, Stang A, Grönemeyer D, Seibel R, Mann K, Volbracht L, Siegrist J, Erbel R. Smoking  
49 cessation and subclinical atherosclerosis-results from the Heinz Nixdorf Recall Study.  
50 *Atherosclerosis*. 2009;203(1):221-7.  
51  
52  
53  
54  
55  
56  
57  
58  
59  
60

- 1  
2  
3 50. Latza U, Hoffmann W, Terschüren C, Chang-Claude J, Kreuzer M, Schaffrath Rosario A,  
4 Kropp S, Stang A, Ahrens W, Lampert T. Erhebung, Quantifizierung und Analyse der  
5 Rauchexposition in epidemiologischen Studien. Berlin, Robert Koch-Institut; 2005.  
6  
7  
8  
9 51. GKV-Hilfsmittelverzeichnis. Available from: [https://www.rehadat-](https://www.rehadat-gkv.de/informationen/index.html)  
10 [gkv.de/informationen/index.html](https://www.rehadat-gkv.de/informationen/index.html). Accessed August 15, 2018.  
11  
12  
13 52. Siegrist J, Broer M. & Junge, A (1996). Profil der Lebensqualität chronisch Kranker.  
14 Manual. Göttingen: Beltz Test GmbH.  
15  
16  
17 53. Moerman S, Vochteloo AJ, Tuinebreijer WE, Maier AB, Mathijssen NM, Nelissen RG.  
18 Factors associated with the course of health-related quality of life after a hip fracture. Arch  
19 Orthop Trauma Surg. 2016;136(7):935-43.  
20  
21  
22  
23 54. Samuelsson B, Hedström MI, Ponzer S, Söderqvist A, Samnegård E, Thorngren KG,  
24 Cederholm T, Säaf M, Dalen N. Gender differences and cognitive aspects on functional  
25 outcome after hip fracture--a 2 years' follow-up of 2,134 patients. Age Ageing.  
26 2009;38(6):686-92.  
27  
28  
29  
30  
31 55. Collins LM & Lanza ST (2009): Latent Class and Latent Transition Analysis: With  
32 Applications in the Social, Behavioral, and Health Sciences. ISBN: 978-0-470-22839-5.  
33  
34  
35  
36 56. Buntin MB & Zaslavsky AM. Too much ado about two-part models and transformation?  
37 Comparing methods of modeling Medicare expenditures. Journal of Health Economics.  
38 2004;23(3):525–542.  
39  
40  
41  
42 57. Zou GA. Modified Poisson Regression Approach to Prospective Studies with Binary  
43 Data. Am J Epidemiol. 2004;159(7):702–6.  
44  
45  
46 58. Barber J & Thompson S. Multiple regression of cost data: use of generalised linear  
47 models. J Health Serv Res Policy. 2004;9(4):197–204.  
48  
49  
50 59. Guidelines and Recommendations to Assure Good Epidemiologic Practice (GEP). Long  
51 Version. German Society for Epidemiology (DGEpi). In Collaboration with the German  
52 Association for Medical Informatics, Biometrics, and Epidemiology (GMDS), German  
53 Association for Social Medicine and Prevention (DGSMP), German Region of the  
54 International Biometrics Association (DR-IBS). With revisions after evaluation April 2004.  
55 With supplement by implementation rule for Good Practice Secondary Data Analysis (GPS)  
56  
57  
58  
59  
60

- 1  
2  
3 July 2008. Online Publication; Available from:  
4 [http://dgepi.de/fileadmin/pdf/GEP\\_LL\\_english\\_f.pdf](http://dgepi.de/fileadmin/pdf/GEP_LL_english_f.pdf). Accessed February 17, 2018  
5  
6  
7  
8 60. Swart E, Gothe H, Geyer S, Jaunzeme J, Maier B, Grobe TG, Ihle P; German Society for  
9 Social Medicine and Prevention; German Society for Epidemiology. [Good Practice of  
10 Secondary Data Analysis (GPS): Guidelines and Recommendations. Third Revision  
11 2012/2014]. *Gesundheitswesen*. 2015 Feb;77(2):120-6.  
12  
13  
14  
15 61. Nicholls SG, Quach P, von Elm E, Guttman A, Moher D, Petersen I, Sørensen HT,  
16 Smeeth L, Langan SM, Benchimol E. The REporting of Studies Conducted Using  
17 Observational Routinely-Collected Health Data (RECORD) Statement: Methods for  
18 Arriving at Consensus and Developing Reporting Guidelines. *PLoS One*.  
19 2015;10:e0125620.  
20  
21  
22  
23  
24  
25 62. Swart E, Bitzer EM, Gothe H, Harling M, Hoffmann F, Horenkamp-Sonntag D et al. [A  
26 Consensus German Reporting Standard for Secondary Data Analyses, Version 2  
27 (STROSA-STandardisierte BerichtsROutine für SekundardatenAnalysen)].  
28 *Gesundheitswesen*. 2016;78(S01):e145-e160.  
29  
30  
31  
32  
33 63. Chan AW, Tetzlaff JM, Altman DG, Laupacis A, Gøtzsche PC, Krleža-Jerić K,  
34 Hróbjartsson A, Mann H, Dickersin K, Berlin JA, Doré CJ, Parulekar WR, Summerskill  
35 WS, Groves T, Schulz KF, Sox HC, Rockhold FW, Rennie D, Moher D. SPIRIT 2013  
36 statement: defining standard protocol items for clinical trials. *Ann Intern Med*.  
37 2013;158:200–7.  
38  
39  
40  
41  
42 64. Chan AW, Tetzlaff JM, Gøtzsche PC, Altman DG, Mann H, Berlin JA, Dickersin K,  
43 Hróbjartsson A, Schulz KF, Parulekar WR, Krleža-Jerić K, Laupacis A, Moher D.  
44 SPIRIT 2013 explanation and elaboration: guidance for protocols of clinical trials. *BMJ*.  
45 2013;346:e7586.  
46  
47  
48  
49  
50 65. Melanie Calvert, Derek Kyte, Rebecca Mercieca-Bebber, Anita Slade, An-Wen Chan,  
51 Madeleine T. King, and the SPIRIT-PRO Group. Guidelines for Inclusion of Patient-  
52 Reported Outcomes in Clinical Trial Protocols The SPIRIT-PRO Extension *JAMA*.  
53 2018;319(5):483-494. doi:10.1001/jama.2017.21903  
54  
55  
56  
57  
58  
59  
60

### **Authors contributions**

SA, MR, and AI drafted the manuscript. SA, MR, GM, FH, AS, MB, JB, KJ, AF, BH, VG, WA, LT, DC, RH, ST, PF, CGGS, JW, CJR participated in the design and preparation of the study. BH and VG provided statistical analysis support. GM, FH, AS, MB, JB, KJ, AF, BH, VG, WA, LT, DC, RH, ST, PF, CGGS, JW, CJR critically revised the manuscript's drafts. All authors approved the final version of the manuscript.

### **Funding statement**

This work was supported by the Innovation Fund coordinated by the Innovation Committee of the Federal Joint Committee (G-BA) in Germany; grant number: 01VSF16043.

### **Competing interests statement**

The authors declare that they have no competing interests.

### **Data sharing statement**

Data are subject to national data protection laws and later on only available upon formal request.

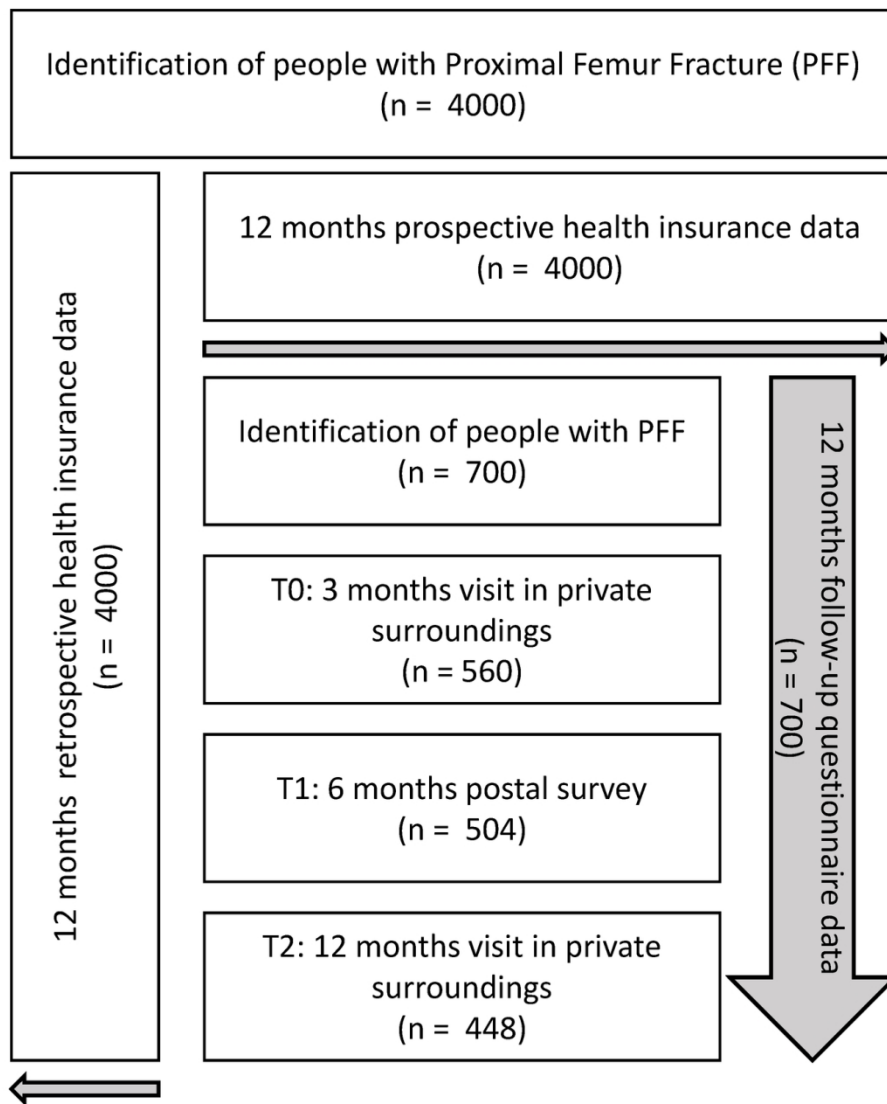

Figure 1 Study design

127x147mm (300 x 300 DPI)

## Appendix A

OPS-Codes for:

- closed reduction and osteosynthesis with intramedullary nail, plate or dynamic hip screw:  
5-790.0e, 5-790.3e, 5-790.3f, 5-790.4e, 5-790.4f, 5-790.5e, 5-790.5f, 5-790.7e, 5-790.7f, 5-790.8e, 5-790.8f
- open reduction of a simple fracture on the proximal femur and osteosynthesis with intramedullary nail, plate or dynamic hip screw:  
5-793.2e, 5-793.2f, 5-793.4e, 5-793.4f, 5-793.5e, 5-793.5f, 5-793.ae, 5-793.af, 5-793.be, 5-793.bf
- open reduction of a multifragmentary fracture on the proximal femur and osteosynthesis with intramedullary nail, plate or dynamic hip screw:  
5-794.1e, 5-794.1f, 5-794.3f, 5-794.3e, 5-794.4f, 5-794.4e, 5-794.ae, 5-794.af, 5-794.be, 5-794.bf and,
- implantation of hip endoprosthesis:  
5-820

## Appendix B

### Inclusion and exclusion criteria of the study population

#### Inclusion criteria:

- 60 years or older
- Resident in North Rhine-Westphalia
- Continuously insured with the AOK Rheinland/Hamburg at least 12 months prior to PFF
- PFF identified using ICD-10 codes S72.0, S72.1 and S72.2, and OPS-Codes (for OPS-Codes see Appendix A)

#### Exclusion criteria:

- Lack of German language skills
- People with e.g. dementia or reduced state of health who are no longer able to personally participate in the interview and for whom no eligible caregiving relative (person of trust) or legal guardian can be found to perform a proxy interview



STROBE Statement—Checklist of items that should be included in reports of *cohort studies*

|                              | Item No | Recommendation                                                                                                                                                                                                                                                                                                         | Page No                                                                                      |
|------------------------------|---------|------------------------------------------------------------------------------------------------------------------------------------------------------------------------------------------------------------------------------------------------------------------------------------------------------------------------|----------------------------------------------------------------------------------------------|
| <b>Title and abstract</b>    | 1       | (a) Indicate the study's design with a commonly used term in the title or the abstract<br>(b) Provide in the abstract an informative and balanced summary of what was done and what was found                                                                                                                          | 1<br>3                                                                                       |
| <b>Introduction</b>          |         |                                                                                                                                                                                                                                                                                                                        |                                                                                              |
| Background/rationale         | 2       | Explain the scientific background and rationale for the investigation being reported                                                                                                                                                                                                                                   | 5                                                                                            |
| Objectives                   | 3       | State specific objectives, including any prespecified hypotheses                                                                                                                                                                                                                                                       | 5                                                                                            |
| <b>Methods</b>               |         |                                                                                                                                                                                                                                                                                                                        |                                                                                              |
| Study design                 | 4       | Present key elements of study design early in the paper                                                                                                                                                                                                                                                                | 6                                                                                            |
| Setting                      | 5       | Describe the setting, locations, and relevant dates, including periods of recruitment, exposure, follow-up, and data collection                                                                                                                                                                                        | 6-7                                                                                          |
| Participants                 | 6       | (a) Give the eligibility criteria, and the sources and methods of selection of participants. Describe methods of follow-up<br>(b) For matched studies, give matching criteria and number of exposed and unexposed                                                                                                      | 6-7,<br>27-28<br>no                                                                          |
| Variables                    | 7       | Clearly define all outcomes, exposures, predictors, potential confounders, and effect modifiers. Give diagnostic criteria, if applicable                                                                                                                                                                               | 8-14                                                                                         |
| Data sources/<br>measurement | 8*      | For each variable of interest, give sources of data and details of methods of assessment (measurement). Describe comparability of assessment methods if there is more than one group                                                                                                                                   | 8-14                                                                                         |
| Bias                         | 9       | Describe any efforts to address potential sources of bias                                                                                                                                                                                                                                                              | 15-17                                                                                        |
| Study size                   | 10      | Explain how the study size was arrived at                                                                                                                                                                                                                                                                              | 15                                                                                           |
| Quantitative variables       | 11      | Explain how quantitative variables were handled in the analyses. If applicable, describe which groupings were chosen and why                                                                                                                                                                                           | 16-17                                                                                        |
| Statistical methods          | 12      | (a) Describe all statistical methods, including those used to control for confounding<br>(b) Describe any methods used to examine subgroups and interactions<br>(c) Explain how missing data were addressed<br>(d) If applicable, explain how loss to follow-up was addressed<br>(e) Describe any sensitivity analyses | 16-17<br>16-17<br>No<br>No<br>No                                                             |
| <b>Results</b>               |         |                                                                                                                                                                                                                                                                                                                        |                                                                                              |
| Participants                 | 13*     | (a) Report numbers of individuals at each stage of study—eg numbers potentially eligible, examined for eligibility, confirmed eligible, included in the study, completing follow-up, and analysed<br>(b) Give reasons for non-participation at each stage<br>(c) Consider use of a flow diagram                        | 7, 15,<br>Study<br>Design<br>Mono-<br>Image<br>No<br>7,<br>Study<br>Design<br>Mono-<br>Image |

|    |                          |     |                                                                                                                                                                                                              |    |
|----|--------------------------|-----|--------------------------------------------------------------------------------------------------------------------------------------------------------------------------------------------------------------|----|
| 1  | Descriptive data         | 14* | (a) Give characteristics of study participants (eg demographic, clinical, social) and information on exposures and potential confounders                                                                     | No |
| 2  |                          |     | (b) Indicate number of participants with missing data for each variable of interest                                                                                                                          | No |
| 3  |                          |     | (c) Summarise follow-up time (eg, average and total amount)                                                                                                                                                  | No |
| 4  | Outcome data             | 15* | Report numbers of outcome events or summary measures over time                                                                                                                                               | No |
| 5  |                          |     |                                                                                                                                                                                                              |    |
| 6  | Main results             | 16  | (a) Give unadjusted estimates and, if applicable, confounder-adjusted estimates and their precision (eg, 95% confidence interval). Make clear which confounders were adjusted for and why they were included | No |
| 7  |                          |     | (b) Report category boundaries when continuous variables were categorized                                                                                                                                    | No |
| 8  |                          |     | (c) If relevant, consider translating estimates of relative risk into absolute risk for a meaningful time period                                                                                             | No |
| 9  | Other analyses           | 17  | Report other analyses done—eg analyses of subgroups and interactions, and sensitivity analyses                                                                                                               | No |
| 10 | <b>Discussion</b>        |     |                                                                                                                                                                                                              |    |
| 11 | Key results              | 18  | Summarise key results with reference to study objectives                                                                                                                                                     | No |
| 12 | Limitations              | 19  | Discuss limitations of the study, taking into account sources of potential bias or imprecision. Discuss both direction and magnitude of any potential bias                                                   | No |
| 13 | Interpretation           | 20  | Give a cautious overall interpretation of results considering objectives, limitations, multiplicity of analyses, results from similar studies, and other relevant evidence                                   | No |
| 14 | Generalisability         | 21  | Discuss the generalisability (external validity) of the study results                                                                                                                                        | No |
| 15 | <b>Other information</b> |     |                                                                                                                                                                                                              |    |
| 16 | Funding                  | 22  | Give the source of funding and the role of the funders for the present study and, if applicable, for the original study on which the present article is based                                                | 26 |

\*Give information separately for exposed and unexposed groups.

**Note:** An Explanation and Elaboration article discusses each checklist item and gives methodological background and published examples of transparent reporting. The STROBE checklist is best used in conjunction with this article (freely available on the Web sites of PLoS Medicine at <http://www.plosmedicine.org/>, Annals of Internal Medicine at <http://www.annals.org/>, and Epidemiology at <http://www.epidem.com/>). Information on the STROBE Initiative is available at <http://www.strobe-statement.org>.

# BMJ Open

## Healthcare provision, functional ability and quality of life after proximal femoral fracture - 'ProFem': Study protocol of a population-based, prospective study based on individually linked survey and statutory health insurance data

|                               |                                                                                                                                                                                                                                                                                                                                                                                                                                                                                                                                                                                                                                                                                                                                                                                                                                                                                                                                                                                                                                                                                                                                                                                                                                                                                                                                                                                                                                                                                                                                                                                                                                                                                                                                                                                                                                                                                                                                                                                                                                                                                                                                                                                                                                                                                                                                                                                                                                      |
|-------------------------------|--------------------------------------------------------------------------------------------------------------------------------------------------------------------------------------------------------------------------------------------------------------------------------------------------------------------------------------------------------------------------------------------------------------------------------------------------------------------------------------------------------------------------------------------------------------------------------------------------------------------------------------------------------------------------------------------------------------------------------------------------------------------------------------------------------------------------------------------------------------------------------------------------------------------------------------------------------------------------------------------------------------------------------------------------------------------------------------------------------------------------------------------------------------------------------------------------------------------------------------------------------------------------------------------------------------------------------------------------------------------------------------------------------------------------------------------------------------------------------------------------------------------------------------------------------------------------------------------------------------------------------------------------------------------------------------------------------------------------------------------------------------------------------------------------------------------------------------------------------------------------------------------------------------------------------------------------------------------------------------------------------------------------------------------------------------------------------------------------------------------------------------------------------------------------------------------------------------------------------------------------------------------------------------------------------------------------------------------------------------------------------------------------------------------------------------|
| Journal:                      | <i>BMJ Open</i>                                                                                                                                                                                                                                                                                                                                                                                                                                                                                                                                                                                                                                                                                                                                                                                                                                                                                                                                                                                                                                                                                                                                                                                                                                                                                                                                                                                                                                                                                                                                                                                                                                                                                                                                                                                                                                                                                                                                                                                                                                                                                                                                                                                                                                                                                                                                                                                                                      |
| Manuscript ID                 | bmjopen-2018-028144.R1                                                                                                                                                                                                                                                                                                                                                                                                                                                                                                                                                                                                                                                                                                                                                                                                                                                                                                                                                                                                                                                                                                                                                                                                                                                                                                                                                                                                                                                                                                                                                                                                                                                                                                                                                                                                                                                                                                                                                                                                                                                                                                                                                                                                                                                                                                                                                                                                               |
| Article Type:                 | Protocol                                                                                                                                                                                                                                                                                                                                                                                                                                                                                                                                                                                                                                                                                                                                                                                                                                                                                                                                                                                                                                                                                                                                                                                                                                                                                                                                                                                                                                                                                                                                                                                                                                                                                                                                                                                                                                                                                                                                                                                                                                                                                                                                                                                                                                                                                                                                                                                                                             |
| Date Submitted by the Author: | 19-Mar-2019                                                                                                                                                                                                                                                                                                                                                                                                                                                                                                                                                                                                                                                                                                                                                                                                                                                                                                                                                                                                                                                                                                                                                                                                                                                                                                                                                                                                                                                                                                                                                                                                                                                                                                                                                                                                                                                                                                                                                                                                                                                                                                                                                                                                                                                                                                                                                                                                                          |
| Complete List of Authors:     | <p>Andrich, Silke; Heinrich-Heine-University Düsseldorf, Institute for Health Services Research and Health Economics, Centre for Health and Society, Faculty of Medicine; German Diabetes Center, Leibniz Center for Diabetes Research at the Heinrich-Heine-University Düsseldorf, Institute for Health Services Research and Health Economics</p> <p>Ritschel, Michaela; Heinrich-Heine-University Düsseldorf, Institute for Health Services Research and Health Economics, Centre for Health and Society, Faculty of Medicine</p> <p>Meyer, Gabriele; Martin Luther University Halle-Wittenberg, Institute for Health and Nursing Sciences, Medical Faculty</p> <p>Hoffmann, Falk; Carl von Ossietzky University, Department of Health Services Research, Faculty of Medicine and Health Sciences</p> <p>Stephan, Astrid; Martin Luther University Halle-Wittenberg, Institute for Health and Nursing Sciences, Medical Faculty</p> <p>Baltes, Marion; Martin Luther University Halle-Wittenberg, Institute for Health and Nursing Sciences, Medical Faculty</p> <p>Blessin, Juliane; Martin Luther University Halle-Wittenberg, Institute for Health and Nursing Sciences, Medical Faculty</p> <p>Jobski, Kathrin; Carl von Ossietzky University Oldenburg, Department of Health Services Research, Faculty of Medicine and Health Sciences</p> <p>Fassmer, Alexander; Carl von Ossietzky University Oldenburg, Department of Health Services Research, Faculty of Medicine and Health Sciences</p> <p>Haastert, Burkhard; mediStatistica</p> <p>Gontscharuk, Veronika; Heinrich-Heine-University Düsseldorf, Institute for Health Services Research and Health Economics, Centre for Health and Society, Faculty of Medicine</p> <p>Arend, Werner; Heinrich-Heine-University Düsseldorf, Institute for Health Services Research and Health Economics, Centre for Health and Society, Faculty of Medicine</p> <p>Theunissen, Lena; Heinrich-Heine-University Düsseldorf, Institute for Health Services Research and Health Economics, Centre for Health and Society, Faculty of Medicine</p> <p>Colley, Denise; Heinrich-Heine-University Düsseldorf, Institute for Health Services Research and Health Economics, Centre for Health and Society, Faculty of Medicine</p> <p>Hinze, Raoul; Heinrich-Heine-University Düsseldorf, Institute for Health Services Research and Health Economics, Centre for Health and Society,</p> |

|                                 |                                                                                                                                                                                                                                                                                                                                                                                                                                                                                                                                                                                                                                                                                                                                                                                                                                                                                                            |
|---------------------------------|------------------------------------------------------------------------------------------------------------------------------------------------------------------------------------------------------------------------------------------------------------------------------------------------------------------------------------------------------------------------------------------------------------------------------------------------------------------------------------------------------------------------------------------------------------------------------------------------------------------------------------------------------------------------------------------------------------------------------------------------------------------------------------------------------------------------------------------------------------------------------------------------------------|
|                                 | <p>Faculty of Medicine<br/> Thelen, Simon; University Hospital Düsseldorf, Department of Trauma and Hand Surgery<br/> Fuhrmann, Petra; AOK Rheinland/Hamburg, Department Health Policy – Health Economics – Press Relations<br/> Sorg, Christian; AOK Rheinland/Hamburg, Department Health Policy – Health Economics – Press Relations<br/> Windolf, Joachim; University Hospital Düsseldorf, Department of Trauma and Hand Surgery<br/> Rupprecht, Christoph J.; AOK Rheinland/Hamburg, Department Health Policy – Health Economics – Press Relations<br/> Icks, Andrea; Heinrich-Heine-University Düsseldorf, Institute for Health Services Research and Health Economics, Centre for Health and Society, Faculty of Medicine; German Diabetes Center, Leibniz Center for Diabetes Research at the Heinrich-Heine-University Düsseldorf, Institute for Health Services Research and Health Economics</p> |
| <b>Primary Subject Heading</b>: | Health services research                                                                                                                                                                                                                                                                                                                                                                                                                                                                                                                                                                                                                                                                                                                                                                                                                                                                                   |
| Secondary Subject Heading:      | Epidemiology, Health services research, Public health, Geriatric medicine                                                                                                                                                                                                                                                                                                                                                                                                                                                                                                                                                                                                                                                                                                                                                                                                                                  |
| Keywords:                       | proximal femoral fracture, healthcare provision, patient-reported outcomes, data linkage                                                                                                                                                                                                                                                                                                                                                                                                                                                                                                                                                                                                                                                                                                                                                                                                                   |
|                                 |                                                                                                                                                                                                                                                                                                                                                                                                                                                                                                                                                                                                                                                                                                                                                                                                                                                                                                            |

SCHOLARONE™  
Manuscripts

## Study protocol

### **Healthcare provision, functional ability and quality of life after proximal femoral fracture - ‘ProFem’: Study protocol of a population-based, prospective study based on individually linked survey and statutory health insurance data**

Silke Andrich<sup>1, 2\*</sup>, Michaela Ritschel<sup>1\*</sup>, Gabriele Meyer<sup>3</sup>, Falk Hoffmann<sup>4</sup>, Astrid Stephan<sup>3</sup>, Marion Baltes<sup>3</sup>, Juliane Blessin<sup>3</sup>, Kathrin Jobski<sup>4</sup>, Alexander M. Fassmer<sup>4</sup>, Burkhard Haastert<sup>1, 5</sup>, Veronika Gontscharuk<sup>1</sup>, Werner Arend<sup>1</sup>, Lena Theunissen<sup>1</sup>, Denise Colley<sup>1</sup>, Raoul Hinze<sup>1</sup>, Simon Thelen<sup>6</sup>, Petra Fuhrmann<sup>7</sup>, Christian G. G. Sorg<sup>7</sup>, Joachim Windolf<sup>6</sup>, Christoph J. Rupprecht<sup>7</sup>, Andrea Icks<sup>1, 2</sup>

\* Shared first authorship

<sup>1</sup> Institute for Health Services Research and Health Economics, Centre for Health and Society, Faculty of Medicine, Heinrich-Heine-University Düsseldorf, Düsseldorf, Germany

<sup>2</sup> Institute for Health Services Research and Health Economics, German Diabetes Center, Leibniz Center for Diabetes Research at the Heinrich-Heine-University Düsseldorf, Düsseldorf, Germany

<sup>3</sup> Martin Luther University Halle-Wittenberg, Institute for Health and Nursing Sciences, Medical Faculty, Halle (Saale), Germany

<sup>4</sup> Department of Health Services Research, Faculty of Medicine and Health Sciences, Carl von Ossietzky University Oldenburg, Germany

<sup>5</sup> mediStatistica, Neuenrade, Germany

<sup>6</sup> Department of Trauma and Hand Surgery, University Hospital Düsseldorf, Germany

<sup>7</sup> Department Health Policy – Health Economics – Press Relations, AOK Rheinland/Hamburg, Düsseldorf, Germany

Corresponding author

Dr. Silke Andrich

Institute for Health Services Research and Health Economics

Centre for Health and Society

Faculty of Medicine

Heinrich-Heine-University Düsseldorf

1  
2  
3 Moorenstr. 5

4  
5 40225 Düsseldorf, Germany

6  
7 Fon: +49 211 33 82 402; Fax: +49 211 33 82 677

8  
9 Email: silke.andrich@uni-duesseldorf.de

10  
11 **Keywords:** proximal femoral fracture, healthcare provision, patient-reported outcomes, data  
12 linkage  
13

14  
15 **Word count:** 4.252

16  
17  
18 **Tables:**

19  
20 Table 1 Overview of assessed parameters from SHI and questionnaire data

21  
22 Table 2 Precision of the estimators of the physical and mental component summary score (SF-  
23 36)  
24

25  
26  
27 **Figures:**

28  
29 Figure 1 Study design  
30  
31  
32  
33  
34  
35  
36  
37  
38  
39  
40  
41  
42  
43  
44  
45  
46  
47  
48  
49  
50  
51  
52  
53  
54  
55  
56  
57  
58  
59  
60

## Abstract

Introduction: Proximal femoral fractures (PFF) are among the most frequent fractures in older people. However, the situation of people with a PFF after hospital discharge is poorly understood. Our aim is to (1) analyse healthcare provision, (2) examine clinical and patient-reported outcomes (PROs), (3) describe clinical and sociodemographic predictors of these, and (4) develop an algorithm to identify subgroups with poor outcomes and a potential need for more intensive healthcare.

Methods and analysis: This is a population-based prospective study based on individually linked survey and statutory health insurance (SHI) data. All people aged minimum 60 who have been continuously insured with the AOK Rheinland/Hamburg and experience a PFF within one year will be consecutively included (SHI data analysis). Additionally, seven hundred people selected randomly from the study population will be consecutively invited to participate in the survey. Questionnaire data will be collected in the participants' private surroundings at three, six, and 12 months after hospital discharge. If the insured person considers themselves to be only partially or not at all able to take part in the survey, a proxy person will be interviewed where possible. SHI variables include healthcare provision, healthcare costs, and clinical outcomes. Questionnaire variables include information on PROs, lifestyle characteristics, and socio-economic status. We will use multiple regression models to estimate healthcare processes and outcomes including mortality and cost, investigate predictors, perform non-responder analysis, and develop an algorithm to identify vulnerable subgroups.

Ethics and dissemination: The study was approved by the ethics committee of the Faculty of Medicine, Heinrich-Heine-University Düsseldorf (approval reference 6128R). All participants including proxies providing written and informed consent can withdraw from the study at any time. The study findings will be disseminated through scientific journals and public information.

Registration details: The study has been registered with the German Clinical Trials Register (DRKS; DRKS00012554).

### Strengths and limitations of this study

- To the best of our knowledge, this is the first study to conduct an individual data linkage between statutory health insurance (SHI) data and questionnaire data in the field of research on proximal femoral fractures (PFF).
- Individually linked survey and SHI data is used to answer a variety of health service research, clinical, and patient-orientated questions in people with PFF.
- Vulnerable subgroups, such as people with dementia, are included in our study.
- Due to structural differences between populations insured with various SHI funds and regions, the generalisability of our findings might be limited.



## Introduction

Proximal femoral fractures (PFF) are among the most frequent fractures in older people (1, 2). However, knowledge about the situation of those affected by a PFF is scarce (3-5). Studies indicate poor outcomes following a PFF: 50% of those affected retained functional limitations (6), 15% were newly admitted to a nursing home (7), and around 20% died within one year (8). Although post-operative programmes showed positive effects (6-11), more than 60% of patients received no further treatment (6), suggesting shortcomings in the care provided. Specific aspects of healthcare provision, such as treatment in geriatric trauma centres or rehabilitation, have hardly been investigated. Existing international studies suggest a healthcare gap (6, 12). It is currently unclear as to which patients particularly benefit from specific care models (13). In addition to healthcare processes, patient-reported outcomes (PROs) such as health-related quality of life (HRQoL), functional ability, and social participation in older people following PFF have hardly been investigated. Subgroups characterised by particularly poor clinical and patient-reported outcomes, and by a potential need of more intensive care, have not yet been identified.

Therefore, the aims of this study are (1) to analyse healthcare provision after PFF, (2) to examine clinical outcomes (such as re-hospitalisation, occurrence of need for care, nursing home admission, death) and PROs (such as HRQoL, functional ability, social participation) after PFF, and (3) to describe clinical and sociodemographic predictors of these (such as comorbidity, age, sex, social support). In doing so, (4) the aim is to identify subgroups who have poor outcomes (e. g. people living at home with low social support, comorbidity, and high healthcare utilisation) and are potentially in need of more intensive healthcare. This will be done by developing an algorithm which generates a 'case finding' to detect those groups of people.

Our project is funded by the Innovation Fund coordinated by the Innovation Committee of the Federal Joint Committee (grant number: 01VSF16043).

## Methods and analysis

### *Study design and population*

This is a population-based prospective study based on statutory health insurance (SHI) data and questionnaire data collected from people insured with the AOK Rheinland/Hamburg. Overall, the AOK Rheinland/Hamburg covers more than 2.5 million insured people in North Rhine-Westphalia (NRW), which has the highest population of all German Federal States, with approximately 25% aged 60 or older. All people resident in NRW aged 60 or over and who have been continuously insured with the AOK Rheinland/Hamburg for at least 12 months prior to PFF and experience a PFF between January 2018 and January 2019 will be consecutively included in the study. People with PFF will be identified consecutively over one year along with their exact date of hospital discharge using SHI diagnoses (main or secondary diagnosis) and operational procedure keys. A fracture event is defined according to the 10<sup>th</sup> revision of the International Classification of Diseases (ICD-10) codes S72.0 (fracture of head and neck of femur), S72.1 (peritrochanteric femoral fracture), and S72.2 (subtrochanteric femoral fracture), and selected surgical, and procedural keys (OPS-Codes, see Appendix A).

This study comprises two populations: all identified people as described above belong to the 1) study population based on SHI data. For those, a comprehensive analysis of SHI data covering 12 months before and 12 months after the fracture event will be performed. Furthermore, a 2) random sample – drawn from the overall SHI study population – will be consecutively invited to additionally participate in a survey. An algorithm will be applied weekly to ensure a random selection of the survey sample. Questionnaire data collection is planned at three and 12 months after hospital discharge using Pen-and-Paper Personal Interviews (PAPI) with participants in a private surrounding, and at six months after discharge by means of a postal survey. Sufficient German language skills are a prerequisite for participation in the survey (Appendix B). If the insured person considers themselves to be only partially or not at all able to take part in the survey, e.g. due to dementia or reduced state of health, an attempt will be made to conduct the interview with a caregiving relative (person of trust) or a legal guardian either additionally or on behalf of the insured person. The following criteria will be used to identify an eligible proxy: they must know the insured person well, should visit the insured person twice a week on average, and support them in everyday life. The participation of the proxy is always voluntary. If a person is too ill to be interviewed at baseline but willing to stay in the study, we will try to arrange an interview at the next time interval. People no longer able to take part in the interviews

1  
2  
3 themselves and with no eligible caregiving relative or legal guardian to perform a proxy  
4 interview with will be excluded (Appendix B).  
5  
6

7 Figure 1 displays the flow through the study. The sample size calculation will be described  
8 further below.  
9  
10

### 11 *Figure 1 Study design*

#### 12 **Recruitment**

13  
14  
15  
16 First contact to arrange an appointment for the visit in the private surrounding will be made by  
17 postal letter. The letter contains a cover letter, information on the study and on data protection,  
18 and the consent form for participation for prior information. The letter will also ask the insured  
19 person (or their proxy) to contact the study centre to arrange an appointment. A written reminder  
20 will be sent to non-responders after approximately two weeks, followed by telephone contact  
21 as a next step. Where no telephone number is available, a second reminder will be sent.  
22 Response will be monitored consecutively and proportions will be calculated to describe  
23 participation behaviour (14, 15).  
24  
25  
26  
27  
28  
29

#### 30 **Data Collection - Data Sources and Variables**

31  
32  
33 Data will be collected from the sources outlined above. SHI data collected from consenting  
34 individuals 12 months before and 12 months after the event will be individually linked to  
35 questionnaire data. The SHI data will be used to measure healthcare provision and clinical  
36 outcomes in the 12 months after PFF. Healthcare provision is described for various healthcare  
37 areas: inpatient and outpatient care, rehabilitation, nursing services, prescribed medication,  
38 remedies and medical aids as well as costs for the different healthcare areas, transportation, and  
39 costs in total. Clinical outcomes are re-hospitalisation, care dependency (including new  
40 occurrences), admission to a nursing home, and mortality. SHI data collected 12 months after  
41 PFF and 12 months before PFF will also be evaluated regarding predictors such as demographic  
42 characteristics and comorbidity. The questionnaire data will be used to record PROs, which  
43 focus on HRQoL, functional ability, social participation, pain, and fear of falling. Self-reported  
44 predictors include demographic characteristics as well as socio-economic status, social support,  
45 lifestyle, healthcare utilisation, and special health-related events. Questions on PROs should be  
46 answered by the insured person whenever possible. If the insured person is not able to respond  
47 to an abridged version of the questionnaire comprising the questions on the aforementioned  
48 PROs, the proxy will be asked to respond to the entire questionnaire except the questions on  
49 pain and fear of falling (please see Table 1). Interviews will be conducted by trained  
50  
51  
52  
53  
54  
55  
56  
57  
58  
59  
60

1  
2  
3 interviewers. An interviewer manual and standard operating procedures will be provided for  
4 quality assurance purposes and to ensure a standardised approach.  
5  
6

### 7 ***Outcomes***

8  
9 The following variables will be recorded for the aforementioned purpose:  
10

#### 11 SHI data

#### 12 Healthcare provision

13  
14  
15  
16  
17 Healthcare provision will be evaluated using the following variables: number of hospital  
18 admissions after PFF; length of hospital stay (LOS) for each hospital admission; admission to  
19 a specialist department; physician contact per billing quarter; number and kind of different  
20 specialists involved; number, duration and kind of inpatient and/or outpatient rehabilitation;  
21 number, duration and kind of nursing services; institutional long-term care or short-term care;  
22 number and kind of prescribed medications; and number and kind of remedies and medical  
23 aids. Furthermore, healthcare costs will include: inpatient costs; outpatient costs; rehabilitation  
24 costs; nursing services costs; medication costs; costs for remedies and medical aids; and costs  
25 for transportation. Healthcare costs will be shown in euro. Since outpatient data is only provided  
26 in quarters, these cost values will be equally distributed over the time span (e.g. in weeks).  
27  
28  
29  
30  
31  
32  
33

#### 34 Clinical Outcomes

35  
36  
37 Re-hospitalisation is addressed by the variables already named above (number of hospital  
38 admissions after PFF, LOS for each hospital admission, and admission to a specialist  
39 department). Care dependency (including new occurrences) is defined by a classification  
40 system for a person's impairment of autonomy and displayed in five care degrees according to  
41 the German Nursing Care Act. The five care degrees are depending on the amount of care  
42 needed and with a range from the level of care 1 (minor impairment of the person's autonomy)  
43 up to level 5 (heaviest impairment with special demands on nursing care) (16). The maximum  
44 level of care in the period before the PFF hospital stay will be considered. Admission to a  
45 nursing home is assessed by the type of service, including e.g. provision of short-term or long-  
46 term care along with the exact date. The date of death of people with PFF who died during the  
47 observation period will be recorded to assess mortality.  
48  
49  
50  
51  
52  
53  
54  
55  
56  
57  
58  
59  
60

## Questionnaire data

### Patient-reported outcomes (PROs)

#### *Health-related quality of life*

Overall HRQoL will be measured using the 12-Item Short Form Health Survey (SF-12) covering the previous four weeks of a person's life (17). The SF-12 is the shorter version of the Short Form-36 Health Survey (SF-36) and contains one or two items for the following eight health dimensions: physical functioning; role functioning; bodily pain; general health perception; energy/vitality; social functioning; emotional functioning; and mental health. The SF-12 comprises two summary scores – a physical component summary score (PCS) and a mental component summary score (MCS). In the SF-12, a better health-related quality of life is denoted by higher values. The SF-12 is one of the best-known and most frequently used instruments to assess HRQoL and its measurement performance has been tested (18).

The European Quality of Life 5-Dimensions questionnaire (EQ-5D) is a generic preference-based measure of health status and consists of two parts – a questionnaire and a visual analogue scale (EQ-VAS) (19, 20). The questionnaire contains five dimensions: mobility, self-care, usual activities, pain/discomfort, and anxiety/depression. Each dimension is rated on a 5-level (5L) scale. The result of the questionnaire can be summarised as perceived state of health (from best to worst state where “11111” is the best and “55555” the worst state). The EQ-VAS is a scale for rating health between 100 (best imaginable state of health) and zero (worst imaginable state of health), expressing health on the day of completion. The EQ-5D is a well-accepted and frequently used instrument with good psychometric properties (21).

#### *Functional ability*

Functional ability will be measured using three instruments.

The Oxford Hip Score (OHS) is a hip-specific 12-item questionnaire to assess activities of daily living (ADL) with six questions relating to pain (type and the resulting impairments in mobility) and six questions relating to functional ability (self-care, mobility, and independence), each referring to the last four weeks (22, 23). Answers to the questions are categorised in five dimensions, ranging from 0 (worst outcome) to 4 (best outcome). The sum of all values provides an overall score between 0 and 48. A high overall score indicates a better outcome with 48 being the best outcome. The reliability and validity of the OHS has been assessed in a German population with osteoarthritis of the hip (24).

1  
2  
3 The Heuschmann et al. (2005) (25) version of the Barthel Index (BI), a common measure of  
4 ADL, provides an interview and a paper and pencil form. The BI comprises ten domains which  
5 are divided into self-care and mobility. Self-care includes feeding, bathing, grooming, dressing,  
6 toilet use, and bowel and bladder control. Mobility consists of transfer, mobility, and stairs. The  
7 interview version comprises 17 questions. The postal survey includes ten questions – one for  
8 each domain. The person's overall ADL score is classified according to an ordinal scale where  
9 0 is the lowest score and 20 indicates complete independence. Comprehensibility and reliability  
10 of both questionnaires were tested in stroke patients (25).  
11  
12

13  
14  
15  
16  
17  
18 Pre-fracture functional level will be assessed using the Mobility Parker Score (MPS) (26),  
19 which evaluates a person's ability to get about the house, out of the house, and to go shopping.  
20 Each item is rated from 0 ('no difficulty') to 3 ('not at all'). The answers result in a total score  
21 ranging from 'no walking ability at all' to 'total independence' (0-9).  
22  
23

### 24 25 *Social Participation*

26  
27  
28 The Index for Measuring Participation Restrictions (IMET) measures the restriction of  
29 participation of people with different chronic diseases (27, 28). Based on the dimensions of the  
30 International Classification of Functioning, Disability and Health (ICF), this tool covers nine  
31 aspects of everyday activities and participation. This includes self-care, daily duties, and  
32 responsibilities at and outside home, recreation, social activities, personal relations, sex, and  
33 stress and extraordinary strains. The impairment caused by a disease is evaluated for each item  
34 by means of an 11-level scale (0 - 10). Lower IMET values suggest better social participation.  
35 A summary score can be calculated. The psychometric properties have been tested for different  
36 patient groups (28).  
37  
38  
39  
40  
41  
42

### 43 44 *Pain*

45  
46  
47 Pain will be recorded as follows: the current level of pain, the average level of pain during the  
48 last four weeks and the highest level of pain during the last four weeks will be rated on a  
49 numerical rating scale (1 - 5) (29).  
50  
51

### 52 53 *Fear of falling and falls*

54  
55 The assessment of fear of falling (30) includes a question about occurrence and frequency of  
56 fear (31), and a question about the occurrence and frequency of activities avoided due to fear  
57 of falling (31). The number and frequency of falls are recorded over the 12 months prior to the  
58  
59  
60

1  
2  
3 fracture as well as the period after the fracture (32, 33). A single question is used to determine  
4 whether it is the first fracture.  
5  
6

7 Overall, we considered the recent recommendations regarding core outcomes and appropriate  
8 instruments to be used in trials with older people with hip fractures (34, 35, 36). We selected  
9 instruments that are suitable for personal interviews, postal survey, and proxy assessments. We  
10 decided for the SF-12 instead of the SF-36 to reduce the length of the questionnaire (34).  
11  
12  
13  
14

## 15 ***Predictors***

### 16 SHI data

#### 17 *Demographic characteristics and comorbidity*

18  
19 Age, sex, and region of residence will be considered. Comorbidity, number of prescribed  
20 medications, number of inpatient stays in hospital, level of care, and healthcare costs for the  
21 year prior to the fracture will be considered as possible predictors 12 months before PFF. Age  
22 will be defined by the year of the fracture event and classified into five-year age groups. Region  
23 of residence will be denoted by the first two numbers of the postcode. Additionally, overall  
24 comorbidity-related disease burden will be assessed using the enhanced Charlson comorbidity  
25 index for ICD-10 codes (37, 38). In accordance with previous studies (39-42), the Charlson  
26 comorbidity index will be calculated using inpatient diagnoses 52 weeks before (<) the index  
27 week and outpatient diagnoses four quarters before (<) the index quarter. A score variable will  
28 sum up and categorise comorbidities from 0, 1, 2-3, 4-5, and 6+.  
29  
30  
31  
32  
33  
34  
35  
36  
37  
38  
39

### 40 Questionnaire data

#### 41 *Demographic characteristics*

42  
43 The assessment of demographic characteristics comprises marital status, nationality, and  
44 country of birth.  
45  
46  
47  
48

#### 49 *Socio-economic status*

50  
51 The socio-economic status includes education and income. Education will be recorded based  
52 on the International Standard Classification of Education (ISCED). Education level is grouped  
53 into three categories ranging from low to high (43). Income will be determined by the  
54 equivalised disposable income. For this purpose, the net household income will be recorded by  
55 providing 15 categories of income, the household size, and the number of people living in the  
56 household including information regarding sex, age, and relationship to the participant (33).  
57  
58  
59  
60



1  
2  
3 The number of children, professional position, indication of professional activity, and  
4 information on the current employment situation will also be assessed. Subjective social status  
5 will be rated using a 10 rung self-anchoring scale in the form of a ladder (44, 45).  
6  
7

### 8 9 *Social support*

10  
11 Social support will be captured by using the Oslo Social Support Scale, which consists of three  
12 questions regarding close people to rely on; other people's concern and interest in the  
13 participant's life; and ease of obtaining help from neighbours (46). Answers will be scored from  
14 1 to 4 or 5. The individual values will be added to a total score, which can have values between  
15 3 and 14 with higher values indicating higher social support (47).  
16  
17  
18  
19

### 20 21 *Lifestyle factors*

22  
23 Questions regarding lifestyle factors include: physical activity (33, 48); smoking status, and if  
24 applicable the amount of cigarettes, cigars, pipes, and cigarillos smoked per day (49, 50);  
25 alcohol consumption and binge drinking (33). Height and weight will be recorded as  
26 anthropometric measures.  
27  
28  
29

### 30 31 *Healthcare utilisation*

32  
33 Intake and use of medication will be recorded within five questions to assess healthcare  
34 utilisation beyond SHI data. Participants will be asked about their current intake of analgesics,  
35 use of over the counter medication, and the presence of a medication plan. Photographs will be  
36 taken of the plan or drug package(s) and a question asked about who is responsible for drug  
37 preparation. It will also be assessed if medications are administered long-term or prescribed as  
38 needed. Furthermore, the current pattern of use of remedies and medical aids and their  
39 possession before the fracture will be recorded using different pictures of remedies and medical  
40 aids (51).  
41  
42  
43  
44  
45  
46  
47

### 48 49 *Special health-related events*

50  
51 The assessment of special negative and positive health-related events as significant incidents  
52 comprises the previous six-month period and the last seven days. Participants will be asked if  
53 they experienced any positive or negative events and if so, which events can be named (52).  
54  
55  
56

57 Table 1 provides an overview of all assessed parameters from SHI and questionnaire data.  
58  
59  
60



| Category                 | Source of Data                                                  | Acquisition of                        | Instruments/Variables                                                                                                                                                | 12 Month before PFF | 3 Month    | 6 Month | 12 Month |   |
|--------------------------|-----------------------------------------------------------------|---------------------------------------|----------------------------------------------------------------------------------------------------------------------------------------------------------------------|---------------------|------------|---------|----------|---|
|                          |                                                                 |                                       |                                                                                                                                                                      |                     | after PFF  |         |          |   |
| Outcomes                 | Statutory Health Insurance Data (SHI data)                      | <b>Healthcare provision</b>           |                                                                                                                                                                      |                     | Continuous |         |          |   |
|                          |                                                                 | Inpatient care                        | Number of hospital admissions, length of hospital stay, admission to a specialist department                                                                         |                     |            |         |          |   |
|                          |                                                                 | Outpatient care                       | Physician contact per billing quarter (yes/no), number and kind of specialists involved                                                                              |                     |            |         |          |   |
|                          |                                                                 | Rehabilitation                        | Number, duration and kind of inpatient/outpatient rehabilitation                                                                                                     |                     |            |         |          |   |
|                          |                                                                 | Nursing services                      | Number, duration and kind of nursing services/institutional long-term care/short-term care                                                                           |                     |            |         |          |   |
|                          |                                                                 | Prescribed medication                 | Number and kind of prescribed medication                                                                                                                             |                     |            |         |          |   |
|                          |                                                                 | Remedies and medical aids             | Number and kind of remedies and medical aids                                                                                                                         |                     |            |         |          |   |
|                          |                                                                 | Costs                                 | Inpatient costs, outpatient costs, rehabilitation costs, nursing services costs, medication costs, costs for remedies and medical aids, and costs for transportation |                     |            |         |          |   |
|                          |                                                                 | <b>Clinical outcomes</b>              |                                                                                                                                                                      |                     |            |         |          |   |
|                          |                                                                 | Re-hospitalisation                    | Number of hospital admissions, length of hospital stay, admission to a specialist department                                                                         |                     |            |         |          |   |
|                          | Care dependency (including new occurrences)                     | Level of care                         |                                                                                                                                                                      |                     |            |         |          |   |
|                          | Admission to a nursing home                                     | Type of service, date of admission    |                                                                                                                                                                      |                     |            |         |          |   |
|                          | Mortality                                                       | Date of death                         |                                                                                                                                                                      |                     |            |         |          |   |
|                          | Questionnaire data                                              | <b>Patient-reported outcomes</b>      |                                                                                                                                                                      |                     |            |         |          |   |
|                          |                                                                 | Health-related quality of life        | SF-12 <sup>1, 2, 3</sup>                                                                                                                                             |                     |            | X       | X        | X |
| EQ-5D <sup>1, 2, 3</sup> |                                                                 |                                       |                                                                                                                                                                      |                     | X          | X       | X        |   |
| Functional ability       |                                                                 | Oxford Hip Score <sup>1, 3</sup>      |                                                                                                                                                                      |                     | X          | X       | X        |   |
|                          |                                                                 | Barthel Index <sup>1, 3</sup>         |                                                                                                                                                                      |                     | X          | X       | X        |   |
|                          |                                                                 | Mobility Parker Score <sup>1, 3</sup> |                                                                                                                                                                      |                     | X          |         |          |   |
| Social participation     | IMET <sup>1, 2, 3</sup>                                         |                                       |                                                                                                                                                                      | X                   | X          | X       |          |   |
| Pain                     | Numeric rating scale of the German Pain Society <sup>1, 2</sup> |                                       |                                                                                                                                                                      | X                   | X          | X       |          |   |

|                                      |                                                                                               |                                    |                                                                                                                                                                                  |   |   |   |   |
|--------------------------------------|-----------------------------------------------------------------------------------------------|------------------------------------|----------------------------------------------------------------------------------------------------------------------------------------------------------------------------------|---|---|---|---|
|                                      |                                                                                               | Fear of falling and falls          | Occurrence and frequency of fear of falling <sup>1,2</sup> , occurrence and frequency of fear-related avoidance of activities <sup>1,2</sup> , frequency of falls <sup>1,3</sup> |   | X | X | X |
| Predictors                           | SHI data                                                                                      | <b>Demographic characteristics</b> | Age, sex, region of residence                                                                                                                                                    |   | X |   |   |
|                                      |                                                                                               | <b>Comorbidity</b>                 | Number of prescribed medication                                                                                                                                                  | X |   |   |   |
|                                      |                                                                                               |                                    | Number of inpatient stays                                                                                                                                                        |   |   |   |   |
|                                      |                                                                                               |                                    | Level of care                                                                                                                                                                    |   |   |   |   |
|                                      |                                                                                               |                                    | Costs                                                                                                                                                                            |   |   |   |   |
|                                      | Charlson comorbidity index                                                                    |                                    |                                                                                                                                                                                  |   |   |   |   |
|                                      | Questionnaire data                                                                            | <b>Demographic characteristics</b> | Marital status <sup>1,3</sup>                                                                                                                                                    |   | X |   | X |
|                                      |                                                                                               |                                    | Nationality <sup>1,3</sup>                                                                                                                                                       |   | X |   |   |
|                                      |                                                                                               |                                    | Country of birth <sup>1,3</sup>                                                                                                                                                  |   | X |   |   |
|                                      |                                                                                               | <b>Socio-economic status</b>       | Level of education (ISCED) <sup>1,3</sup>                                                                                                                                        |   | X |   |   |
|                                      |                                                                                               |                                    | Equivalised disposable income <sup>1,3</sup>                                                                                                                                     |   | X |   | X |
|                                      |                                                                                               |                                    | Subjective social status using MacArthur scale (German version) <sup>1,2,3</sup>                                                                                                 |   | X |   | X |
|                                      |                                                                                               | <b>Social support</b>              | Oslo Social Support Scale <sup>1,2,3</sup>                                                                                                                                       |   | X |   | X |
|                                      |                                                                                               | <b>Lifestyle factors</b>           | Physical activity, smoking status, alcohol consumption <sup>1,3</sup>                                                                                                            |   | X |   | X |
|                                      |                                                                                               |                                    | Height, weight (anthropometry) <sup>1,3</sup>                                                                                                                                    |   | X |   | X |
| <b>Health care utilisation</b>       | Intake and use of medication <sup>1,3</sup> , use of remedies and medical aids <sup>1,3</sup> |                                    | X                                                                                                                                                                                |   | X |   |   |
| <b>Special health-related events</b> | Positive and negative health-related events <sup>1,3</sup>                                    |                                    | X                                                                                                                                                                                |   | X |   |   |

<sup>1</sup> = participant; <sup>2</sup> = participant who is only partially able to take part in the survey; <sup>3</sup> = proxy

Table 1 Overview of assessed parameters from SHI and questionnaire data

### ***Patient and Public involvement***

Patients were not involved in the definition of the research questions and modelling of the design and outcome measures. They were also not engaged in the recruitment and conduct of the study. Our aim is to include patients in the interpretation of the study results if possible. Public involvement is achieved through the active role of the AOK Rheinland/Hamburg, a statutory health insurance company that represents the interests of its members. The results of the study will be disseminated to the study participants through public information such as the customer magazine *AOK Vigo*.

### ***Sample size***

According to data from the year 2014 provided by the AOK Rheinland/Hamburg, at least 4,000 insured people aged 60 or over are expected to experience a PFF within 12 months. Of these, 700 randomly selected people will be consecutively invited to participate in the survey. The sample size should make it possible to show specific healthcare provision (rehabilitation, treatment, and medical care), and outcomes in relevant subgroups (age, sex, migration background, various social contexts). The data currently available from literature is insufficient for performing a detailed calculation of sample size. However, age and sex specific estimates are available for HRQoL (53), mortality (8), and rehabilitation (54). The precision of the estimates of these parameters has been examined a priori, assuming the expected 4,000 people with PFF and the random sample of  $n = 700$  based on the age and sex distribution of the insured population of AOK Rheinland/Hamburg in 2014. The aim is to achieve a response of 80% of the target population. A dropout of 20% is expected after 12 months, including participants who die (approx. 20%) (8). This results in  $448 (= 0.8 \cdot 0.8 \cdot 700)$  participants after 12 months. The precision of the estimators was evaluated by calculating the PCS and MCS for HRQoL based on the sample size stratified by age and sex. From the results presented in Table 2, it can be concluded that the sample size provides sufficient accuracy for estimating HRQoL. It will be possible to identify differences between men and women and age groups. If the observed response considerably differs from the expected response we will adjust the number of weekly contacted persons up to exhausting the whole SHI study population.

|            | N = 700* | SD<br>for PCS, MCS | Estimator<br>PCS | 95%-CI<br>(PCS) | Estimator<br>MCS | 95%-CI<br>(MCS) |
|------------|----------|--------------------|------------------|-----------------|------------------|-----------------|
| <b>Age</b> |          |                    |                  |                 |                  |                 |
| <80        | 163      | 10                 | 41.6             | (40.1-43.1)     | 41.7             | (40.2-43.2)     |
| >=80       | 285      | 10                 | 35.3             | (34.1-36.5)     | 38.8             | (37.6-40.0)     |
| <b>Sex</b> |          |                    |                  |                 |                  |                 |
| Men        | 126      | 10                 | 41.2             | (39.5-42.9)     | 41.0             | (39.3-42.7)     |
| Women      | 322      | 10                 | 36.9             | (35.8-38.0)     | 39.8             | (38.7-40.9)     |

SD = standard deviation; PCS = physical component summary score; MCS = mental component summary score; CI = confidence interval; \*n = 448 after 12 months

Table 2 Precision of the estimators of the physical and mental component summary score (SF-36)

### ***Planned statistical analysis***

Depending on the research question, statistical analyses are carried out using either 1) SHI data or 2) SHI data and questionnaire data, which are combined to a linkage dataset. In general, the SHI population of all identified PFF patients and the survey sample will be described using baseline variables by prevalence (with 95% confidence interval (CI)), means, medians, standard deviations (SD) or percentiles depending on their distributions.

The variables of healthcare provision will be investigated using descriptive methods. Furthermore, healthcare provision will be evaluated by latent class analysis (LCA) and latent transition analysis (LTA). LCA is a modelling technique used to categorise participants into a number of unique (unobserved) classes. Participants are homogeneous with respect to their healthcare utilisation within each latent class and heterogeneous between classes. LCA typically uses cross-sectional data to identify subgroups at a single time point. LTA is an extension of LCA using longitudinal data where individuals transition between latent classes over time (55). Healthcare costs will be displayed in euro and categorised in approximately quintile classes. Calculations of total mean costs and mean costs per component and a 95% bootstrap CI will be performed.

Clinical outcomes will be analysed using Kaplan-Meier survival curves and Cox regression. Two analyses will be conducted regarding mortality, the first for the entire SHI study population, the second for the survey sample addressing the prognosis for people who have already survived at least three months. The mortality of the SHI study population will be

1  
2  
3 compared to the German population  $\geq 60$  years. Age and sex-specific relative mortality rates  
4 will be calculated. Standardised mortality ratios (SMR) and comparative mortality figures  
5 (CMF) will be estimated together with 95% CI.  
6  
7

8  
9 PROs will be studied using stratified descriptive analysis. Among others, outcomes related to  
10 PROs will be considered separately according to dementia status and state of health. Graphical  
11 or regression methods will be used to describe and exploratively estimate the association  
12 between paired self-reported and proxy values in the subpopulation of participants with  
13 dementia/reduced state of health at fixed time points. It will be discussed, whether imputation  
14 of transformed proxy values in missing outcome values should be done. Further subpopulations  
15 will be considered for sensitivity analyses: participants without dementia / reduced state of  
16 health, participants with dementia / reduced state of health only with self-reported values resp.  
17 only with proxy values. Furthermore, participants changing between self-reported and proxy  
18 values during follow up will be described separately. Depending on frequencies and results,  
19 specific imputation methods for self-reported values will be discussed.  
20  
21  
22  
23  
24  
25  
26  
27

28  
29 Possible predictors to healthcare provision, clinical, and patient-reported outcomes will be  
30 investigated using mixed linear or logistic regression models, depending on the distribution of  
31 outcomes. Furthermore, two-part models (56-58) will be used to investigate associations within  
32 cost analysis. Repeated measurements per participant will be adjusted by random effects in the  
33 mixed models.  
34  
35  
36  
37

38  
39 At least one binary indicator for 'severe cases' will be derived from the outcomes. Different  
40 competing definitions for 'severe cases' could be combined in order to choose the final  
41 indicator. Furthermore, a latent class or latent transition analysis including different variables  
42 might be considered. An algorithm will be derived from one half of the study population based  
43 on the binary case indicator using logistic regression models with independent variables  
44 selected from the baseline variables to classify the risk of a 'severe case' after PFF. A final  
45 selection of variables for the algorithm will be made using goodness of fit criteria and stepwise,  
46 forward, and backward selection procedures. A score will be derived via the final model and  
47 tested with the other half of the study population (randomly chosen).  
48  
49  
50  
51  
52  
53

54  
55 Furthermore, a non-responder analysis will be performed based on individual SHI data,  
56 available for responders and non-responders. Descriptive statistics and corresponding statistical  
57 tests will be used to describe response at all observation intervals. Logistic regression analysis  
58  
59  
60

1  
2  
3 with subsequent multiple adjustment will be used to obtain (adjusted) odds ratios for belonging  
4 to the response group.  
5  
6

7 The study and the data linkage will be performed in line with Good Epidemiological Practice  
8 (GEP) (59), Good Practice of Secondary Data Analysis (GPS) (60), and in accordance with the  
9 REporting of studies Conducted Using Observational Routinely-Collected Health Data  
10 (RECORD) Statement (61), and the Standard for Secondary Data Analyses (62). The data  
11 linkage of questionnaire and SHI data will be performed on an individual level using suitable  
12 key variables.  
13  
14  
15  
16  
17

## 18 **Discussion and practical implications**

19 The results of the study may contribute to improving older people's health-related quality of  
20 life, functional ability, and social participation as well as to the reduction of costs associated  
21 with the avoidable need of care, and hospitalisation after PFF.  
22  
23  
24  
25  
26

## 27 **Conclusion**

28 To our knowledge this is the first study to investigate questions regarding healthcare provision,  
29 health-related quality of life, functional ability, and social participation after PFF. The strength  
30 of our study is the linkage of SHI and questionnaire data as well as the consideration of  
31 important vulnerable subgroups, such as people with dementia.  
32  
33  
34  
35  
36  
37  
38

## 39 **Ethics and dissemination**

40 The study was approved by the responsible ethics committee of the Faculty of Medicine,  
41 Heinrich-Heine-University Düsseldorf (approval reference 6128R). All participants will  
42 provide written and informed consent and can withdraw from the study at any time. All  
43 procedures performed will be in accordance with the Declaration of Helsinki and comparable  
44 ethical standards (e.g., GEP and GPS). The data protection agreement applied for this study  
45 does not cover posting data in public databases. Data will be held at the IVG and mediStatistica.  
46 The development of this study protocol was guided by the Standard Protocol Items:  
47 Recommendations for Interventional Trials (SPIRIT) statement and the SPIRIT-PRO  
48 Extension, where applicable (63-65). The results of the project will help to identify possible  
49 shortcomings in the care of older people with PFF and detect people with special needs of care.  
50 The findings of the study will be disseminated through scientific journals and public  
51 information.  
52  
53  
54  
55  
56  
57  
58  
59  
60

## References

1. Ballane G, Cauley JA, Luckey MM, Fuleihan GE-H. Secular trends in hip fractures worldwide: Opposing Trends East Versus West. *J Bone Miner Res.* 2014;29(8):1745–55.
2. Icks A, Arend W, Becker C, Rapp K, Jungbluth P, Haastert B. Incidence of hip fractures in Germany, 1995–2010. *Arch Osteoporos.* 2013;8:140.
3. Griffin XL, Parsons N, Achten J, Fernandez M, Costa ML. Recovery of health-related quality of life in a United Kingdom hip fracture population: The Warwick Hip Trauma Evaluation - a prospective cohort study. *Bone Joint J.* 2015;97-B(3):372–82.
4. Martin-Martin LM, Arroyo-Morales M, Sanchez-Cruz JJ, Valenza-Demet G, Valenza MC, Jimenez-Moleon JJ. Factors influencing performance-oriented mobility after hip fracture. *J Aging Health.* 2015;27(5):827–42.
5. Sletvold O, Helbostad JL, Thingstad P, Taraldsen K, Prestmo A, Lamb SE, Aamodt A, Johnsen R, Magnussen J, Saltvedt I. Effect of in-hospital comprehensive geriatric assessment (CGA) in older people with hip fracture. The protocol of the Trondheim Hip Fracture Trial. *BMC Geriatr.* 2011;11:18.
6. Stenvall M, Olofsson B, Nyberg L, Lundström M, Gustafson Y. Improved performance in activities of daily living and mobility after a multidisciplinary postoperative rehabilitation in older people with femoral neck fracture: A randomized controlled trial with 1-year follow-up. *J Rehabil Med.* 2007;39(3):232–8.
7. Ohmann C, Smektala R, Pientka L, Paech S, Neuhaus E, Rieger M, Schwabe W, Debold P, Jonas M, Hupe K, Bücken-Nott HJ, Giani G, Szucs TD. [A New Model of Comprehensive Data Linkage – Evaluation of its Application in Femoral Neck Fracture]. *Z. ärztl. Fortbild. Qual. Gesundh.wes.* 2005;99(9):547–54.
8. Smektala R, Ohmann C, Paech S, Neuhaus E, Rieger M, Schwabe W, Debold P, Deimling A, Jonas M, Hupe K, Bücken-Nott HJ, Giani G, Szucs TD, Pientka L. [On the prognosis of hip fractures. Assessment of mortality after hip fractures by analyzing longitudinal data from acute and rehabilitative care]. *Unfallchirurg.* 2005;108(11):927–37.
9. Cameron ID, Handoll HH, Finnegan TP, Madhok R, Langhorne P. Co-ordinated multidisciplinary approaches for inpatient rehabilitation of older patients with proximal femoral fractures. *Cochrane Database Syst Rev.* 2001(3):CD000106.



10. Handoll HHG, Cameron ID, Mak JCS, Finnegan TP. Multidisciplinary rehabilitation for older people with hip fractures. *Cochrane Database SystRev*. 2009(4):CD007125.
11. Lögters T, Hakimi M, Linhart W, Kaiser T, Briem D, Rueger J, Windolf J. [Early interdisciplinary geriatric rehabilitation after hip fracture. Effective concepts or just transfer of costs?]. *Unfallchirurg*. 2008;111:719–726.
12. Morrison R & Siu AL. A Comparison of pain and its treatment in advanced dementia and cognitively intact patients with hip fracture. *J Pain Symptom Manage*. 2000;19(4):240-8.
13. Pioli G, Giusti A & Barone A. Orthogeriatric care for the elderly with hip fractures: where are we? *Aging Clin Exp Res*. 2008; 20(2):113–22.
14. Slattery ML, Edwards SL, Caan BJ, Kerber RA, Potter JD. Response Rates among Control Subjects in Case-Control Studies. *Ann Epidemiol*. 1995;5(3):245–249.
15. Stang A, Moebus S, Dragano N, Beck EM, Möhlenkamp S, Schmermund A, Siegrist J, Erbel R, Jöckel KH, Heinz Nixdorf Recall Study Investigation Group. Baseline recruitment and analyses of nonresponse of the Heinz Nixdorf Recall Study: Identifiability of phone numbers as the major determinant of response. *European Journal of Epidemiology*. 2005;20:489–496.
16. Kimmel A & Breuninger K. Pflegereform 2017. [Reform of the German Long-Term Care Insurance. A New Definition of Care Dependency and a New System to Assess the Need for Long-Term Care]. *Gesundheitswesen* 2016;78(07):477–488.
17. Ware J Jr, Kosinski M & Keller SD. A 12-Item Short-Form Health Survey: construction of scales and preliminary tests of reliability and validity. *Medical care*. 1996;34(3):220–33.
18. Morfeld M, Kirchberger I & Bullinger M. SF-36 – Fragebogen zum Gesundheitszustand. Deutsche Version des Short Form-36 Health Survey. 2., ergänzte und überarbeitete Auflage, 2011, Hogrefe Verlag, Göttingen.
19. Brooks R. EuroQol: the current state of play. *Health Policy*. 1996;37(1):53–72.
20. Herdman M, Gudex C, Lloyd A, Janssen MF, Kind P, Parkin D, Bonsel G, Badia X. Development and preliminary testing of the new five-level version of EQ-5D (EQ-5D-5L). *Quality of Life Research*, 2011;20:1727–1736.



- 1  
2  
3 21. Nemeth G. Health related quality of life outcome instruments. *European spine journal*:  
4 official publication of the European Spine Society, the European Spinal Deformity  
5 Society, and the European Section of the Cervical Spine Research Society. 2006;15 Suppl  
6 1:S44–51.  
7  
8  
9
- 10  
11 22. Dawson J, Fitzpatrick R, Carr A, Murray D. Oxford hip score: Questionnaire on the  
12 perceptions of patients about total hip replacement. *Journal of Bone and Joint Surgery*.  
13 1996; British Volume, 78, 185–190.  
14  
15
- 16  
17 23. Dawson J, Fitzpatrick R, Churchman D, Verjee-Lorenz A, Clayson D. User Manual for  
18 the Oxford Hip Score (OHS). Version 1.0, August 2010. Oxford University Innovation  
19 Limited.  
20  
21
- 22  
23 24. Naal FD, Sieverding M, Impellizzeri FM, von Knoch F, Mannion AF, Leunig M.  
24 Reliability and Validity of the Cross-Culturally Adapted German Oxford Hip Score. *Clin*  
25 *Orthop Relat Res*. 2009;467:952–957.  
26  
27
- 28  
29 25. Heuschmann PU, Kolominsky-Rabas PL, Nolte CH, Hünermund G, Ruf HU, Laumeier I,  
30 Meyrer R, Alberti T, Rahmann A, Kurth T, Berger K. [The Reliability of the German  
31 Version of the Barthel-Index and the Development of a Postal and Telephone Version for  
32 the Application on Stroke Patients]. *Fortschr Neurol Psychiat*. 2005;73:74–82.  
33  
34
- 35  
36 26. Parker MJ & Parker CR. A new mobility score for predicting mortality after hip fracture. *J*  
37 *Bone Joint Surg*. 1993;75-B:797–8.  
38  
39
- 40  
41 27. Deck R, Borowski C, Mittag O, Hüppe A, Raspe H. IMET (Index zur Messung von  
42 Einschränkungen der Teilhabe). Erste Ergebnisse eines ICF-orientierten  
43 Assessmentinstruments. *DRV-Schriften*. 2006;64:152–153.  
44  
45
- 46  
47 28. Deck R, Mittag O, Hüppe A, Muche-Borowski C, Raspe H. Index zur Messung von  
48 Einschränkungen der Teilhabe (IMET) – Erste Ergebnisse eines ICF-orientierten  
49 Assessmentinstruments. *Praxis Klinische Verhaltensmedizin und Rehabilitation*.  
50 2007;76:113–120.  
51  
52
- 53  
54 29. Deutsche Schmerzgesellschaft e.V. Deutscher Schmerz-Fragebogen Version 2015.2.  
55 Available from: <http://www.dgss.org/schmerzfragebogen/>. Accessed August 15, 2017.  
56  
57
- 58  
59 30. Kempen GIJM, van Haastregt JCM, McKee KJ, Delbaere K, Zijlstra, GAR. Socio-  
60 demographic, health-related and psychosocial correlates of fear of falling and avoidance

- of activity in community-living older persons who avoid activity due to fear of falling. *BMC Public Health*. 2009;9:170.
31. Zijlstra GA, van Haastregt JC, van Eijk JT, van Rossum E, Stalenhoef PA, Kempen GI. Prevalence and correlates of fear of falling, and associated avoidance of activity in the general population of community-living older people. *Age and Ageing*. 2007;36 (3):304–309.
32. Rapp K, Freiberger E, Todd C, Klenk J, Becker C, Denkinger M, Scheidt-Nave C, Fuchs J. Fall incidence in Germany: results of two population-based studies, and comparison of retrospective and prospective falls data collection methods. *BMC Geriatr*. 2014, 14:105.
33. Robert Koch Institut. Gesundheitsfragebogen 18 bis 64 Jahre (Studie zur Gesundheit Erwachsener in Deutschland - DEGS). März 2009.
34. Haywood KL, Griffin XL, Achten J & Costa ML. Developing a core outcome set for hip fracture trials. *Bone Joint J*. 2014;96-B:1016–23.
35. Haywood KL, Brett J, Tutton E, Staniszewska S. Patient-reported outcome measures in older people with hip fracture: a systematic review of quality and acceptability. *Qual Life Res*. 2017;26:799–812.
36. Liem IS, Kammerlander C, Suhm N, Blauth M, Roth T, Gosch M, Hoang-Kim A, Mendelson D, Zuckerman J, Leung F, Burton J, Moran C, Parker M, Giusti A, Pioli G, Goldhahn J, Kates SL. Identifying a standard set of outcome parameters for the evaluation of orthogeriatric co-management for hip fractures. *Injury*. 2013;44(11): 1403–1412.
37. Quan H, Sundararajan V, Halfon P, Fong A, Burnand B, Luthi JC, Saunders LD, Beck CA, Feasby TE, Ghali WA. Coding Algorithms for Defining Comorbidities in ICD-9-CM and ICD-10 Administrative Data. *Med Care*. 2005;43(11):1130–9.
38. Sundararajan V, Henderson T, Perry C, Muggivan A, Quan H, Ghali WA. New ICD-10 version of the Charlson comorbidity index predicted in-hospital mortality. *J Clin Epidemiol*. 2004;57(12):1288–94.
39. Toson B, Harvey LA & Close JC. The ICD-10 Charlson Comorbidity Index predicted mortality but not resource utilization following hip fracture. *J Clin Epidemiol*. 2015;68(1):44–51.

- 1  
2  
3 40. Klabunde CN, Potosky AL, Legler JM, Warren JL. Development of a comorbidity index  
4 using physician claims data. *J Clin Epidemiol*. 2000;53(12):1258–67.  
5  
6
- 7 41. Reyes C, Estrada P, Nogués X, Orozco P, Cooper C, Diez-Pérez A, Formiga F, González-  
8 Macias J, Prieto-Alhambra D. The impact of common co-morbidities (as measured using  
9 the Charlson index) on hip fracture risk in elderly men: a population-based cohort study.  
10 *Osteoporos Int*. 2014;25(6):1751–8.  
11  
12
- 13 42. Lix LM, Quail J, Teare G, Acan B. Performance of comorbidity measures for predicting  
14 outcomes in population-based osteoporosis cohorts. *Osteoporos Int*. 2011;22(10):2633–  
15 43.  
16  
17
- 18 43. Avendano M, Jurges H & Mackenbach JP. Educational level and changes in health across  
19 Europe: longitudinal results from SHARE. *J Eur Soc Policy*. 2009;19(4):301–316.  
20  
21
- 22 44. Singh-Manoux A, Adler NE & Marmot MG. Subjective social status: its determinants and  
23 its association with measures of ill-health in the Whitehall II study. *Soc Sci Med*.  
24 2003;56(6):1321–33.  
25  
26
- 27 45. Hoebel J, Mueters S, Kuntz B, Lange C, Lampert T. [Measuring subjective social status in  
28 health research with a German version of the MacArthurs Scale]. *Bundesgesundheitsbl*.  
29 2015;58:749–757.  
30  
31
- 32 46. Kocalevent R & Brähler E (2014). Psychologische und sozial-wissenschaftliche  
33 Kurzskaalen. In: Kemper C, Brähler E, Zenger M (Hrsg.). 1. Aufl. Berlin: Medizinisch  
34 Wissenschaftliche Verlagsgesellschaft mbH & Co. KG, S. 216–219.  
35  
36
- 37 47. Van Lente E, Barry MM, Molcho M, Morgan K, Watson D, Harrington J, Mc Gee H.  
38 Measuring population mental health and social well-being. *International Journal of Public*  
39 *Health*. 2012;57(2):421–430.  
40  
41
- 42 48. Lampert T, Mensink GBM & Müters S. [Physical and sporting activity among adults in  
43 Germany. Results from the “German Health Update 2009” survey]. *Bundesgesundheitsbl*.  
44 2012;55:102–110.  
45  
46
- 47 49. Jöckel KH, Lehmann N, Jaeger BR, Moebus S, Möhlenkamp S, Schmermund A, Dragano  
48 N, Stang A, Grönemeyer D, Seibel R, Mann K, Volbracht L, Siegrist J, Erbel R. Smoking  
49 cessation and subclinical atherosclerosis-results from the Heinz Nixdorf Recall Study.  
50 *Atherosclerosis*. 2009;203(1):221–7.  
51  
52  
53  
54  
55  
56  
57  
58  
59  
60

- 1  
2  
3 50. Latza U, Hoffmann W, Terschüren C, Chang-Claude J, Kreuzer M, Schaffrath Rosario A,  
4 Kropp S, Stang A, Ahrens W, Lampert T. Erhebung, Quantifizierung und Analyse der  
5 Rauchexposition in epidemiologischen Studien. Berlin, Robert Koch-Institut; 2005.  
6  
7  
8  
9 51. GKV-Hilfsmittelverzeichnis. Available from: [https://www.rehadat-](https://www.rehadat-gkv.de/informationen/index.html)  
10 [gkv.de/informationen/index.html](https://www.rehadat-gkv.de/informationen/index.html). Accessed August 15, 2018.  
11  
12  
13 52. Siegrist J, Broer M & Junge A (1996). Profil der Lebensqualität chronisch Kranker.  
14 Manual. Göttingen: Beltz Test GmbH.  
15  
16  
17 53. Moerman S, Vochteloo AJ, Tuinebreijer WE, Maier AB, Mathijssen NM, Nelissen RG.  
18 Factors associated with the course of health-related quality of life after a hip fracture. Arch  
19 Orthop Trauma Surg. 2016;136(7):935–43.  
20  
21  
22  
23 54. Samuelsson B, Hedström MI, Ponzer S, Söderqvist A, Samnegård E, Thorngren KG,  
24 Cederholm T, Säaf M, Dalen N. Gender differences and cognitive aspects on functional  
25 outcome after hip fracture--a 2 years' follow-up of 2,134 patients. Age Ageing.  
26 2009;38(6):686–92.  
27  
28  
29  
30  
31 55. Collins LM & Lanza ST (2009): Latent Class and Latent Transition Analysis: With  
32 Applications in the Social, Behavioral, and Health Sciences. ISBN: 978-0-470-22839-5.  
33  
34  
35  
36 56. Buntin MB & Zaslavsky AM. Too much ado about two-part models and transformation?  
37 Comparing methods of modeling Medicare expenditures. Journal of Health Economics.  
38 2004;23(3):525–542.  
39  
40  
41  
42 57. Zou GA. Modified Poisson Regression Approach to Prospective Studies with Binary  
43 Data. Am J Epidemiol. 2004;159(7):702–6.  
44  
45  
46 58. Barber J & Thompson S. Multiple regression of cost data: use of generalised linear  
47 models. J Health Serv Res Policy. 2004;9(4):197–204.  
48  
49  
50 59. Guidelines and Recommendations to Assure Good Epidemiologic Practice (GEP). Long  
51 Version. German Society for Epidemiology (DGEpi). In Collaboration with the German  
52 Association for Medical Informatics, Biometrics, and Epidemiology (GMDS), German  
53 Association for Social Medicine and Prevention (DGSMP), German Region of the  
54 International Biometrics Association (DR-IBS). With revisions after evaluation April 2004.  
55 With supplement by implementation rule for Good Practice Secondary Data Analysis (GPS)  
56  
57  
58  
59  
60

- 1  
2  
3 July 2008. Online Publication; Available from:  
4 [http://dgepi.de/fileadmin/pdf/GEP\\_LL\\_english\\_f.pdf](http://dgepi.de/fileadmin/pdf/GEP_LL_english_f.pdf). Accessed February 17, 2018  
5  
6  
7  
8 60. Swart E, Gothe H, Geyer S, Jaunzeme J, Maier B, Grobe TG, Ihle P; German Society for  
9 Social Medicine and Prevention; German Society for Epidemiology. [Good Practice of  
10 Secondary Data Analysis (GPS): Guidelines and Recommendations. Third Revision  
11 2012/2014]. *Gesundheitswesen*. 2015 Feb;77(2):120–6.  
12  
13  
14  
15 61. Nicholls SG, Quach P, von Elm E, Guttman A, Moher D, Petersen I, Sørensen HT,  
16 Smeeth L, Langan SM, Benchimol E. The REporting of Studies Conducted Using  
17 Observational Routinely-Collected Health Data (RECORD) Statement: Methods for  
18 Arriving at Consensus and Developing Reporting Guidelines. *PLoS One*.  
19 2015;10:e0125620.  
20  
21  
22  
23  
24  
25 62. Swart E, Bitzer EM, Gothe H, Harling M, Hoffmann F, Horenkamp-Sonntag D et al. [A  
26 Consensus German Reporting Standard for Secondary Data Analyses, Version 2  
27 (STROSA-STandardisierte BerichtsROutine für SekundardatenAnalysen)].  
28 *Gesundheitswesen*. 2016;78(S01):e145–e160.  
29  
30  
31  
32  
33 63. Chan AW, Tetzlaff JM, Altman DG, Laupacis A, Gøtzsche PC, Krleža-Jerić K,  
34 Hróbjartsson A, Mann H, Dickersin K, Berlin JA, Doré CJ, Parulekar WR, Summerskill  
35 WS, Groves T, Schulz KF, Sox HC, Rockhold FW, Rennie D, Moher D. SPIRIT 2013  
36 statement: defining standard protocol items for clinical trials. *Ann Intern Med*.  
37 2013;158:200–7.  
38  
39  
40  
41  
42 64. Chan AW, Tetzlaff JM, Gøtzsche PC, Altman DG, Mann H, Berlin JA, Dickersin K,  
43 Hróbjartsson A, Schulz KF, Parulekar WR, Krleža-Jerić K, Laupacis A, Moher D.  
44 SPIRIT 2013 explanation and elaboration: guidance for protocols of clinical trials. *BMJ*.  
45 2013;346:e7586.  
46  
47  
48  
49  
50 65. Melanie Calvert, Derek Kyte, Rebecca Mercieca-Bebber, Anita Slade, An-Wen Chan,  
51 Madeleine T. King, and the SPIRIT-PRO Group. Guidelines for Inclusion of Patient-  
52 Reported Outcomes in Clinical Trial Protocols The SPIRIT-PRO Extension *JAMA*.  
53 2018;319(5):483–494. doi:10.1001/jama.2017.21903  
54  
55  
56  
57  
58  
59  
60

### **Authors contributions**

SA, MR, and AI drafted the manuscript. SA, MR, GM, FH, AS, MB, JB, KJ, AF, BH, VG, WA, LT, DC, RH, ST, PF, CGGS, JW, CJR participated in the design and preparation of the study. BH and VG provided statistical analysis support. GM, FH, AS, MB, JB, KJ, AF, BH, VG, WA, LT, DC, RH, ST, PF, CGGS, JW, CJR critically revised the manuscript's drafts. All authors approved the final version of the manuscript.

### **Acknowledgement**

We thank all participants and their caregiving relatives (person of trust) or legal guardians for the support of our study.

### **Funding statement**

This work was supported by the Innovation Fund coordinated by the Innovation Committee of the Federal Joint Committee (G-BA) in Germany; grant number: 01VSF16043.

### **Competing interests statement**

The authors declare that they have no competing interests.

### **Data sharing statement**

Data are subject to national data protection laws and later on only available upon formal request.



Figure 1 Study design

127x147mm (300 x 300 DPI)

## Appendix A

OPS-Codes for:

- closed reduction and osteosynthesis with intramedullary nail, plate or dynamic hip screw:  
5-790.0e, 5-790.3e, 5-790.3f, 5-790.4e, 5-790.4f, 5-790.5e, 5-790.5f, 5-790.7e, 5-790.7f, 5-790.8e, 5-790.8f
- open reduction of a simple fracture on the proximal femur and osteosynthesis with intramedullary nail, plate or dynamic hip screw:  
5-793.2e, 5-793.2f, 5-793.4e, 5-793.4f, 5-793.5e, 5-793.5f, 5-793.ae, 5-793.af, 5-793.be, 5-793.bf
- open reduction of a multifragmentary fracture on the proximal femur and osteosynthesis with intramedullary nail, plate or dynamic hip screw:  
5-794.1e, 5-794.1f, 5-794.3f, 5-794.3e, 5-794.4f, 5-794.4e, 5-794.ae, 5-794.af, 5-794.be, 5-794.bf and,
- implantation of hip endoprosthesis:  
5-820



## Appendix B

### Inclusion and exclusion criteria of the study population

#### Inclusion criteria:

- 60 years or older
- Resident in North Rhine-Westphalia
- Continuously insured with the AOK Rheinland/Hamburg at least 12 months prior to PFF
- Surgically treated PFF identified using ICD-10 codes S72.0, S72.1 and S72.2, and OPS-Codes (for OPS-Codes see Appendix A)

#### Exclusion criteria:

- Lack of German language skills
- People with e.g. dementia or reduced state of health who are no longer able to personally participate in the interview and for whom no eligible caregiving relative (person of trust) or legal guardian can be found to perform a proxy interview

STROBE Statement—Checklist of items that should be included in reports of *cohort studies*

|                              | Item No | Recommendation                                                                                                                                                                                                                                                                                                         | Page No                                                                                      |
|------------------------------|---------|------------------------------------------------------------------------------------------------------------------------------------------------------------------------------------------------------------------------------------------------------------------------------------------------------------------------|----------------------------------------------------------------------------------------------|
| <b>Title and abstract</b>    | 1       | (a) Indicate the study's design with a commonly used term in the title or the abstract<br>(b) Provide in the abstract an informative and balanced summary of what was done and what was found                                                                                                                          | 1<br>3                                                                                       |
| <b>Introduction</b>          |         |                                                                                                                                                                                                                                                                                                                        |                                                                                              |
| Background/rationale         | 2       | Explain the scientific background and rationale for the investigation being reported                                                                                                                                                                                                                                   | 5                                                                                            |
| Objectives                   | 3       | State specific objectives, including any prespecified hypotheses                                                                                                                                                                                                                                                       | 5                                                                                            |
| <b>Methods</b>               |         |                                                                                                                                                                                                                                                                                                                        |                                                                                              |
| Study design                 | 4       | Present key elements of study design early in the paper                                                                                                                                                                                                                                                                | 6                                                                                            |
| Setting                      | 5       | Describe the setting, locations, and relevant dates, including periods of recruitment, exposure, follow-up, and data collection                                                                                                                                                                                        | 6-7                                                                                          |
| Participants                 | 6       | (a) Give the eligibility criteria, and the sources and methods of selection of participants. Describe methods of follow-up<br>(b) For matched studies, give matching criteria and number of exposed and unexposed                                                                                                      | 6-7,<br>27-28<br>no                                                                          |
| Variables                    | 7       | Clearly define all outcomes, exposures, predictors, potential confounders, and effect modifiers. Give diagnostic criteria, if applicable                                                                                                                                                                               | 8-14                                                                                         |
| Data sources/<br>measurement | 8*      | For each variable of interest, give sources of data and details of methods of assessment (measurement). Describe comparability of assessment methods if there is more than one group                                                                                                                                   | 8-14                                                                                         |
| Bias                         | 9       | Describe any efforts to address potential sources of bias                                                                                                                                                                                                                                                              | 15-17                                                                                        |
| Study size                   | 10      | Explain how the study size was arrived at                                                                                                                                                                                                                                                                              | 15                                                                                           |
| Quantitative variables       | 11      | Explain how quantitative variables were handled in the analyses. If applicable, describe which groupings were chosen and why                                                                                                                                                                                           | 16-17                                                                                        |
| Statistical methods          | 12      | (a) Describe all statistical methods, including those used to control for confounding<br>(b) Describe any methods used to examine subgroups and interactions<br>(c) Explain how missing data were addressed<br>(d) If applicable, explain how loss to follow-up was addressed<br>(e) Describe any sensitivity analyses | 16-17<br>16-17<br>No<br>No<br>No                                                             |
| <b>Results</b>               |         |                                                                                                                                                                                                                                                                                                                        |                                                                                              |
| Participants                 | 13*     | (a) Report numbers of individuals at each stage of study—eg numbers potentially eligible, examined for eligibility, confirmed eligible, included in the study, completing follow-up, and analysed<br>(b) Give reasons for non-participation at each stage<br>(c) Consider use of a flow diagram                        | 7, 15,<br>Study<br>Design<br>Mono-<br>Image<br>No<br>7,<br>Study<br>Design<br>Mono-<br>Image |

|    |                          |     |                                                                                                                                                                                                              |    |
|----|--------------------------|-----|--------------------------------------------------------------------------------------------------------------------------------------------------------------------------------------------------------------|----|
| 1  | Descriptive data         | 14* | (a) Give characteristics of study participants (eg demographic, clinical, social) and information on exposures and potential confounders                                                                     | No |
| 2  |                          |     | (b) Indicate number of participants with missing data for each variable of interest                                                                                                                          | No |
| 3  |                          |     | (c) Summarise follow-up time (eg, average and total amount)                                                                                                                                                  | No |
| 4  | Outcome data             | 15* | Report numbers of outcome events or summary measures over time                                                                                                                                               | No |
| 5  |                          |     |                                                                                                                                                                                                              |    |
| 6  | Main results             | 16  | (a) Give unadjusted estimates and, if applicable, confounder-adjusted estimates and their precision (eg, 95% confidence interval). Make clear which confounders were adjusted for and why they were included | No |
| 7  |                          |     | (b) Report category boundaries when continuous variables were categorized                                                                                                                                    | No |
| 8  |                          |     | (c) If relevant, consider translating estimates of relative risk into absolute risk for a meaningful time period                                                                                             | No |
| 9  | Other analyses           | 17  | Report other analyses done—eg analyses of subgroups and interactions, and sensitivity analyses                                                                                                               | No |
| 10 | <b>Discussion</b>        |     |                                                                                                                                                                                                              |    |
| 11 | Key results              | 18  | Summarise key results with reference to study objectives                                                                                                                                                     | No |
| 12 | Limitations              | 19  | Discuss limitations of the study, taking into account sources of potential bias or imprecision. Discuss both direction and magnitude of any potential bias                                                   | No |
| 13 | Interpretation           | 20  | Give a cautious overall interpretation of results considering objectives, limitations, multiplicity of analyses, results from similar studies, and other relevant evidence                                   | No |
| 14 | Generalisability         | 21  | Discuss the generalisability (external validity) of the study results                                                                                                                                        | No |
| 15 | <b>Other information</b> |     |                                                                                                                                                                                                              |    |
| 16 | Funding                  | 22  | Give the source of funding and the role of the funders for the present study and, if applicable, for the original study on which the present article is based                                                | 26 |

\*Give information separately for exposed and unexposed groups.

**Note:** An Explanation and Elaboration article discusses each checklist item and gives methodological background and published examples of transparent reporting. The STROBE checklist is best used in conjunction with this article (freely available on the Web sites of PLoS Medicine at <http://www.plosmedicine.org/>, Annals of Internal Medicine at <http://www.annals.org/>, and Epidemiology at <http://www.epidem.com/>). Information on the STROBE Initiative is available at <http://www.strobe-statement.org>.
