# Supplementary material for: Healthcare provision, functional ability and quality of life after proximal femoral fracture - ’ProFem': Study protocol of a population-based, prospective study based on individually linked survey and statutory health insurance data
Source: PubMed Central journal article supplement — BMJ Open. 2019 Jun 25;9(6):e028144. doi: 10.1136/bmjopen-2018-028144 (PMC6597653; doi:10.1136/bmjopen-2018-028144), 2019-06-25
Supplement: bmjopen-2018-028144supp001.pdf [file bmjopen-2018-028144supp001.pdf]

## Appendix A

OPS-Codes for:

- closed reduction and osteosynthesis with intramedullary nail, plate or dynamic hip screw:  
5-790.0e, 5-790.3e, 5-790.3f, 5-790.4e, 5-790.4f, 5-790.5e, 5-790.5f, 5-790.7e, 5-790.7f, 5-790.8e, 5-790.8f
- open reduction of a simple fracture on the proximal femur and osteosynthesis with intramedullary nail, plate or dynamic hip screw:  
5-793.2e, 5-793.2f, 5-793.4e, 5-793.4f, 5-793.5e, 5-793.5f, 5-793.ae, 5-793.af, 5-793.be, 5-793.bf
- open reduction of a multifragmentary fracture on the proximal femur and osteosynthesis with intramedullary nail, plate or dynamic hip screw:  
5-794.1e, 5-794.1f, 5-794.3f, 5-794.3e, 5-794.4f, 5-794.4e, 5-794.ae, 5-794.af, 5-794.be, 5-794.bf and,
- implantation of hip endoprosthesis:  
5-820
