# Supplementary material for: Healthcare provision, functional ability and quality of life after proximal femoral fracture - ’ProFem': Study protocol of a population-based, prospective study based on individually linked survey and statutory health insurance data
Source: PubMed Central journal article supplement — BMJ Open. 2019 Jun 25;9(6):e028144. doi: 10.1136/bmjopen-2018-028144 (PMC6597653; doi:10.1136/bmjopen-2018-028144), 2019-06-25
Supplement: bmjopen-2018-028144supp002.pdf [file bmjopen-2018-028144supp002.pdf]

## **Appendix B**

### Inclusion and exclusion criteria of the study population

#### Inclusion criteria:

- 60 years or older
- Resident in North Rhine-Westphalia
- Continuously insured with the AOK Rheinland/Hamburg at least 12 months prior to PFF
- Surgically treated PFF identified using ICD-10 codes S72.0, S72.1 and S72.2, and OPS-Codes (for OPS-Codes see Appendix A)

#### Exclusion criteria:

- Lack of German language skills
- People with e.g. dementia or reduced state of health who are no longer able to personally participate in the interview and for whom no eligible caregiving relative (person of trust) or legal guardian can be found to perform a proxy interview
